Manuscript version - bioRxiv

## Gene co-expression network reveals highly conserved, well-regulated anti-ageing mechanisms in old ant queens.

---

Authors:

Mark C. Harrison<sup>1</sup>,

Luisa M. Jaimes Niño<sup>2</sup>,

Marisa Almeida Rodrigues<sup>3</sup>,

Judith Ryll<sup>1</sup>,

Thomas Flatt<sup>3</sup>,

Jan Oettler<sup>2\*</sup>,

Erich Bornberg-Bauer<sup>3,4\*</sup>.

Affiliations

<sup>1</sup> Institute for Evolution and Biodiversity, University of Münster, Münster, Germany; <sup>2</sup> University of Regensburg, Regensburg, Germany; <sup>3</sup> Department of Biology, University of Fribourg, Fribourg, Switzerland; <sup>4</sup> Department of Protein Evolution, Max Planck Institute for Developmental Biology, Tübingen, Germany.

\*Corresponding authors: [jan.oettler@ur.de](mailto:jan.oettler@ur.de), [ebb.admin@wwu.de](mailto:ebb.admin@wwu.de)

---

**Keywords:** ageing, selection shadow, social insects, longevity/fecundity trade-off

### Significance Statement:

Understanding the exceptional longevity of ant queens and how they defy the trade-off between fecundity and lifespan remains a major challenge for the evolutionary theory and molecular biology of ageing. In this study we offer several clues as to how this occurs on a molecular level in *C. obscurior* queens. Specifically, we believe a reduction in the selection shadow due to low extrinsic mortality, has allowed the evolution of well-regulated anti-ageing mechanisms. Consequently, we suggest several promising starting points for future research into the poorly understood phenomenon of extreme longevity in ant queens. Making progress in this field will not only allow us to better understand longevity and fertility in social insects but may also offer interesting research strategies for human ageing.

### Abstract

Evolutionary theories of ageing predict a reduction in selection efficiency with age, a so-called ‘selection shadow’, due to extrinsic mortality decreasing effective population size with age. Classic symptoms of ageing include a deterioration in transcriptional regulation and protein homeostasis. Understanding how ant queens defy the trade-off between fecundity and lifespan remains a major challenge for the evolutionary theory of ageing. It has often been discussed that the low extrinsic mortality of ant queens, that are generally well protected within the nest by workers and soldiers, should reduce the selection shadow acting on old queens. We tested this by comparing strength of selection acting on genes upregulated in young and old queens of the ant, *Cardiocondyla obscurior*. In support of a reduced selection shadow, we find old-biased genes to be under strong purifying selection. We also analysed a gene co-expression network (GCN) with the aim to detect signs of ageing in the form of deteriorating regulation and proteostasis. We find no evidence for ageing. In fact, we detect higher connectivity in old queens indicating increased transcriptional regulation with age. Within the GCN, we discover five highly correlated modules that are upregulated with age. These old-biased modules regulate several anti-ageing mechanisms such as maintenance of proteostasis, transcriptional regulation and stress response. We observe stronger purifying selection on central hub genes of these old-biased modules compared to young-biased modules. These results indicate a lack of transcriptional ageing in old *C. obscurior* queens possibly facilitated by strong selection at old age and well-regulated anti-ageing mechanisms.

## 1 Introduction

2 Ageing, the progressive decline of physiological function with age, and thus of survival and fertility, is  
3 common to most multicellular species (Jones *et al.*, 2014). Extensive genetic and molecular studies have  
4 illuminated several proximate mechanisms involved in the ageing process, allowing us to better understand  
5 *how* we age. The majority of these ”hallmarks of ageing” can be attributed to the accumulation of cellular

6 damage (López-Otín *et al.*, 2013; Gems and Partridge, 2013) and an overall deterioration of regulation  
7 (Frenk and Houseley, 2018). One important hallmark of ageing, the loss of protein homeostasis, is caused  
8 by a reduction in quality control mechanisms such as chaperones that support correct folding and structure  
9 of proteins, as well as proteolytic pathways that ensure the removal of misfolded peptides (Koga *et al.*,  
10 2011; Rubinsztein *et al.*, 2011; Tomaru *et al.*, 2012; Calderwood *et al.*, 2009; López-Otín *et al.*, 2013).  
11 The result is an accumulation of toxic, misfolded proteins and an inefficient replenishment of correctly  
12 functioning proteins. Further hallmarks of ageing include deleterious changes in terms of cell-cycle (a  
13 cessation of cellular replication), intercellular communication, nutrient sensing and epigenetic regulation  
14 (López-Otín *et al.*, 2013), as well as a downregulation of mitochondrial and protein synthesis genes  
15 (Frenk and Houseley, 2018). Importantly, the ageing process is often accompanied by a dysregulation of  
16 transcription (Frenk and Houseley, 2018).

17 Several classic evolutionary theories of ageing aim to explain *why* organisms age (Kirkwood and  
18 Austad, 2000; Flatt and Partridge, 2018). These theories generally describe a reduction in selection  
19 efficiency with increasing age because the number of surviving individuals decreases due to extrinsic  
20 mortality. In the mutation accumulation theory, this 'selection shadow' leads to an accumulation of  
21 mutations which have a deleterious effect later in life (Kirkwood and Austad, 2000; Flatt and Partridge,  
22 2018). In support, empirical studies have found that genes with expression biased towards late life are less  
23 conserved than those highly expressed at young age across several tissues and mammalian species (Turan  
24 *et al.*, 2019; Jia *et al.*, 2018) Building on this, the antagonistic pleiotropy theory describes how genes with  
25 beneficial effects early in life can be maintained by selection even if they have pleiotropic negative effects  
26 later in life (Williams, 1957). In the disposable soma theory, the pleiotropic effect of more specific genes  
27 is described, that cause a trade-off between somatic maintenance and reproduction (Kirkwood, 1977), so  
28 that an increased, or early, investment in offspring is expected to come at the price of a shorter lifespan  
29 and vice versa (Kirkwood and Austad, 2000).

30 There are, however, exceptions to these expectations; possibly most notably within social insects,  
31 where reproductive castes exhibit relatively long lifespans compared to their sterile siblings (Keller and  
32 Genoud, 1997). This apparent lack of a trade-off between longevity and fecundity in social insects is at  
33 odds with expectations for the disposable soma theory. The longer life of queens compared to sterile  
34 castes might be explained by low extrinsic mortality due to the protection of a well-defended nest (Keller  
35 and Genoud, 1997; Negroni *et al.*, 2016). The low extrinsic mortality of queens can in turn be expected  
36 to lead to a reduction of the selection shadow as more queens reach old-age, allowing efficient selection  
37 on genes that are important for somatic maintenance late in life.

38 In an attempt to understand the relationship between fecundity and longevity in social insects, several  
39 studies have investigated caste and age-specific expression of putative ageing genes in honeybees (Aamodt,

2009; Aurori *et al.*, 2014; Corona *et al.*, 2005, 2007; Seehuus *et al.*, 2013), ants (Lucas *et al.*, 2016; Lucas and Keller, 2018; Negroni *et al.*, 2019; Von Wyschetzki *et al.*, 2015) and termites (Kuhn *et al.*, 2019; Elsner *et al.*, 2018). One of these studies, which compared gene expression between young and old queens of the ant *Cardiocondyla obscurior*, identified several overlaps with ageing pathways known from *Drosophila melanogaster* (Von Wyschetzki *et al.*, 2015). However, surprisingly, for many genes the ratio of expression level between old and young ant queens was reversed compared to *D. melanogaster*. Further studies comparing expression between castes and age-groups highlight the importance of several gene pathways for longevity in social insects that have previously been implicated in ageing, such as antioxidants (Aurori *et al.*, 2014; Corona *et al.*, 2005; Negroni *et al.*, 2019; Kuhn *et al.*, 2019), immunity (Negroni *et al.*, 2019; Aurori *et al.*, 2014; Lucas and Keller, 2018; Kuhn *et al.*, 2019; Negroni *et al.*, 2016), DNA and somatic repair (Kuhn *et al.*, 2019; Aamodt, 2009; Lucas *et al.*, 2016; Seehuus *et al.*, 2013), respiration (Lockett *et al.*, 2016; Corona *et al.*, 2005), as well as the insulin/insulin-like growth factor (IGF) signaling (IIS) (Kuhn *et al.*, 2019; Aurori *et al.*, 2014) and the target of rapamycin (TOR) signalling pathways (Negroni *et al.*, 2019; Kuhn *et al.*, 2019). The IIS and TOR nutrient sensing pathways are of particular interest in this context, since their role in longevity and fecundity has been extensively studied in model organisms (Tatar *et al.*, 2003; Partridge *et al.*, 2011; Kenyon, 2010; Flatt and Partridge, 2018). These transcriptional studies offer insights into individual genes and their pathways that might be involved in ageing in social insects. However, a more holistic view of gene networks is likely to uncover further important genes as well as insights into transcriptional regulation. For example, a study of gene co-expression networks on mouse brains revealed that with age a decrease in the correlation of expression between genes occurred, showing that transcriptional dysregulation can lead to a significant reduction in gene connectivity (Southworth *et al.*, 2009). These findings demonstrate the application of transcriptional studies for investigating whole pathways and gene networks and their wide-reaching implications for ageing. Furthermore, the extent at which a selection shadow may be reduced for old queens due to a reduction in extrinsic mortality has so far not been formally tested.

To address these questions we investigated transcriptomic data available for young and old queens of the polygynous ant, *C. obscurior* (Von Wyschetzki *et al.*, 2015). These ant queens are relatively short-lived compared to most ant species (median lifespan: 16-26 weeks Kramer *et al.* 2015; Schrempf *et al.* 2005), which is in accordance with expectations for polygynous species, where extrinsic mortality is higher than in monogynous colonies (Keller and Genoud, 1997). Nevertheless, as for most ant species, *C. obscurior* queens (up to 48 weeks) outlive sterile workers that are expected to live around 12 to 16 weeks (Oettler and Schrempf, 2016). Importantly, consistently high reproductive output throughout their lives until immediately before death indicates no apparent reproductive senescence in these ant queens (Kramer *et al.*, 2015). To test for signs of ageing in transcriptional regulation, we carried out a gene

74 co-expression network analysis, in which we identified gene modules related to young mated (4 weeks) and  
75 old mated (18 weeks) queens and compared overall network connectivity. We also tested the hypothesis  
76 that, due to low extrinsic mortality, selection efficiency should not decline with age in queens. We found  
77 evidence for an array of anti-ageing mechanisms that are more tightly regulated in old queens. We could  
78 find no evidence for a selection shadow, indicating stable selection efficiency throughout an ant queen  
79 life.

## 80 Results and Discussion

### 81 *Old-biased genes are not under weaker selection*

82 Evolutionary theories of ageing predict weaker selection on genes which are expressed in old individuals  
83 due to low effective population size and reduced fecundity (Kirkwood and Austad, 2000; Flatt and  
84 Partridge, 2018). In ant queens, we may expect a reduction of this 'selection shadow' as low extrinsic  
85 mortality and lifelong, high fertility should lead to a stable effective population size up to old age. We  
86 tested this by estimating and comparing selection strength between three groups of genes. These were  
87 (i) old-biased genes n=46: significantly over-expressed in seven old (18 weeks) compared to seven young  
88 (4 weeks) *C. obscurior* queens; (ii) young-biased genes (n=96): significantly over-expressed in young  
89 compared to old queens; (iii) unbiased genes (n=2616): no significant difference in expression between  
90 young and old queens. To estimate direction and strength of selection, we measured dN/dS (ratio of  
91 nonsynonymous to synonymous substitution rates) for one-to-one orthologs with a set of 10 ant species  
92 (see methods). A dN/dS ratio  $\approx 1$  indicates neutral evolution, whereas values  $\ll 1$  signify purifying  
93 selection. We find no evidence for weaker purifying selection in old-aged queens, since dN/dS in old-biased  
94 genes (median: 0.084) is in fact significantly lower than in young-biased genes (median: 0.127; p-value  
95 = 0.016; Mann-Whitney U test; fig. 1), indicating increased purifying selection with age. Interestingly,  
96 dN/dS in young-biased genes is also significantly lower than in unbiased genes (median: 0.100; p-value =  
97  $2.2 \times 10^{-4}$ ; Mann-Whitney U test), as has previously been reported for the ant, *Lasius niger* (Lucas *et al.*,  
98 2017). This is in contrast to published results for age-biased genes in humans, in which old-biased genes  
99 had a significantly higher dN/dS (median: 0.22) than young-biased (median: 0.09,  $p = 1.4 \times 10^{-50}$ ), as  
100 would be expected for a reduction in purifying selection with age (Jia *et al.*, 2018). This was confirmed  
101 by a further study on several mammalian tissues, in which an adjusted dN/dS metric correlated more  
102 strongly with expression in young compared to old individuals (Turan *et al.*, 2019). To further test the  
103 ability of this method to detect a selection shadow in insects, we repeated the analysis for *D. melanogaster*.  
104 Age-biased gene expression was measured for a novel data set containing expression data for young (10  
105 days) and old (38 days) female flies across two tissues (head and fat body) and different feeding regimes.

106 Evolutionary rates were obtained for these genes from published analyses based on alignments of 12  
107 *Drosophila* species (Consortium *et al.*, 2007). In contrast to our results for ant queens but in agreement  
108 with expectations for a selection shadow, we find significantly higher dN/dS levels in old-biased fly genes  
109 (median: 0.060) compared to young-biased genes (median: 0.047;  $p=5.1 \times 10^{-8}$ ; Mann-Whitney U test).

110 We also investigated the numbers of ant genes that are under significant positive selection within  
111 old-biased compared to young-biased and unbiased genes, using a site test of the codeml suite (Yang,  
112 1997). Contrary to expectations for weaker selection strength on old queens, we found no difference in  
113 the proportion of genes under positive selection between the three groups of genes (old-biased: 21.7%;  
114 young-biased: 21.9%; unbiased: 16.0%;  $\text{Chi}^2 = 3.3$ ;  $p = 0.19$ ). The effect size of the observed difference  
115 in proportions of genes under positive selection between young- and old-biased genes is so low (cohen's  
116  $h$ : 0.003), that we assume the lack of significance is not due to a lack of power. The genes under  
117 significant positive selection in old-biased genes contain two regulatory genes (transcription factor and  
118 methyltransferase), an electron transport protein, a member of the COPI coatomer complex (important  
119 for protein transport) and *Notch* (Table 1). The latter is the central signalling protein within the Notch  
120 signalling pathway which is involved in tissue homeostasis and age-related diseases (Balistreri *et al.*, 2016).

121 Contrary to expectations based on evolutionary theories of ageing, these results suggest selection is  
122 not weaker on genes expressed mainly in old queens. We speculate that high fertility in old queens,  
123 coupled with an overall low extrinsic mortality, which is typical for social insects (Negroni *et al.*, 2016;  
124 Keller and Genoud, 1997), may reduce the selection shadow in *C. obscurior* queens, leading to similar  
125 selection strength throughout their fertile life.

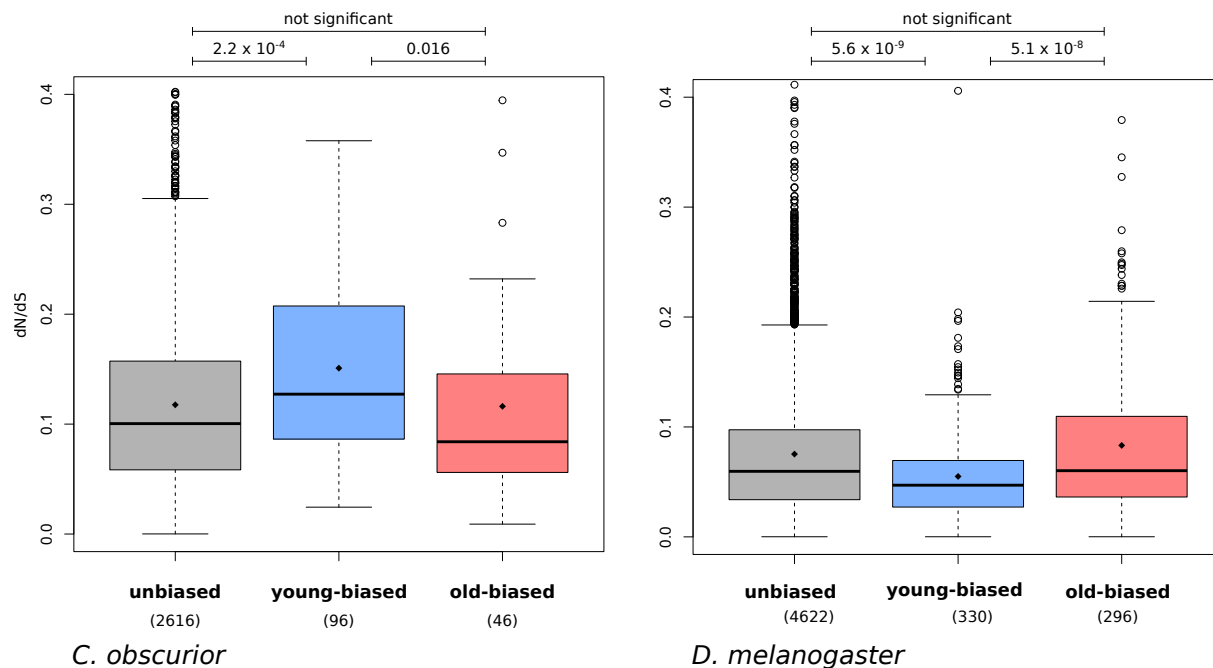

**Figure 1:** Evolutionary rates (dN/dS) in genes with unbiased expression, young-biased and old-biased expression in *C. obscurior* queens and *D. melanogaster* adult females. Significance was tested with Mann-Whitney U test.

**Table 1:** Old-biased genes under significant positive selection.

| Gene       | Ortholog                                             | Putative Function                                                |
|------------|------------------------------------------------------|------------------------------------------------------------------|
| Cobs_01221 | uncharacterised                                      | unknown                                                          |
| Cobs_04278 | FBgn0002121 (l(2)gl)                                 | polarity of neuroblasts and oocytes                              |
| Cobs_06663 | FBgn0085424 (nub)                                    | transcription factor                                             |
| Cobs_08231 | FBgn0004647 (Notch)                                  | tissue homeostasis                                               |
| Cobs_08620 | FBgn0027607 (Dymeclin)                               | organisation of Golgi apparatus                                  |
| Cobs_09212 | FBgn0033686 (Hen1)                                   | methyltransferase, methylates siRNA & piRNA                      |
| Cobs_11651 | FBgn0036714 (CG7692)                                 | unknown function                                                 |
| Cobs_12452 | FBgn0008635 ( $\beta$ COP)                           | subunit of the COPI coatomer complex, transport from Golgi to ER |
| Cobs_16420 | FBgn0034745 (CG4329)                                 | unknown                                                          |
| Cobs_16765 | Cytochrome b561 domain-containing protein 1 (Q8N8Q1) | electron transport protein                                       |

126 *Increased connectivity in old ant queens*

127 In old queens, we expected to find little evidence for age-related transcriptional dysregulation in the form  
 128 of reduced correlation of gene expression, as previously reported for ageing mouse brains (Southworth

129 *et al.*, 2009). We investigated this by measuring gene connectivity separately within old queens and within  
130 young queens, using the *softConnectivity* function of the WGCNA package (Langfelder and Horvath,  
131 2008). This connectivity describes the total strength of correlations that a gene possesses with all other  
132 genes in a gene co-expression network (GCN; Langfelder and Horvath 2008) and is thought to correlate  
133 positively with gene essentiality (Carlson *et al.*, 2006). In fact, we find gene expression connectivity to be  
134 significantly higher in older queens (median: 145.3) than within young queens (median: 142.5; effect size:  
135 0.255;  $p = 4.3 \times 10^{-29}$ ; Wilcoxon signed-rank test), suggesting an increased regulation of gene networks in  
136 older queens.

137 The more highly connected genes in older queens (1471 genes with connectivity fold change  $> 2$ )  
138 are enriched for GO term functions (FDR  $< 0.1$ ) related to protein synthesis, transcription, purine  
139 synthesis, cellular respiration and ATP metabolism (Table S1). Most of the 20 genes with the strongest  
140 increase in connectivity in old queens (4.8-7.1 fold increase) compared to young queens are involved in  
141 transcriptional regulation (7 genes) or protein homeostasis (6 genes; Table S2). For example, a member  
142 of the 26S proteasome complex, important for the degradation of misfolded proteins, is the gene with the  
143 highest increase in connectivity in old queens. As has been shown for several organisms, including humans  
144 (Lee *et al.*, 2010), yeast (Kruegel *et al.*, 2011) and *C. elegans* (Vilchez *et al.*, 2012), increased proteasome  
145 activity can extend lifespan by reducing proteotoxic stress (López-Otín *et al.*, 2013). An increase in  
146 connectivity of fatty-acid synthase 3 may have implications for colony communication. Further highly  
147 connected genes include ribosomal proteins or genes involved in the correct folding, post-translation  
148 modification or transport of proteins. The genes with highly increased connectivity in old ant queens,  
149 which are involved in transcriptional regulation, include two transcription factors, a transcriptional co-  
150 regulator (*taranis*), and four mRNA regulators. These results suggest that, contrary to expectations for  
151 ageing individuals, increased transcriptional regulation and protein homeostasis takes place in old queens.

### 152 *Co-expression modules related to age*

153 We constructed a signed, weighted gene co-expression network (GCN, Langfelder and Horvath 2008)  
154 based on the correlation of normalised gene expression across all 14 samples (7 young queens & 7 old  
155 queens). Within the GCN, genes could be grouped into 27 modules, within which gene expression was  
156 especially strongly correlated (Fig. 2). To determine the importance of these modules for old and young  
157 queens, we first calculated eigengene expression based on the first principal component of each module.  
158 We then correlated eigengene expression of each module with the binary trait 'age' (young & old). Five  
159 of the modules were significantly, positively correlated with age ( $p < 0.05$ ; FDR  $< 0.1$ ), indicating  
160 an overall higher expression of these modules in old compared to young queens. Three modules were



161 significantly, negatively correlated with young queens, indicating a downregulation in old queens. To  
162 validate these correlations, we analysed difference in expression of genes between old and young queens  
163 ( $\log_2[\text{expression}_{old}/\text{expression}_{young}]$ ) within each of these modules. Accordingly, the median  $\log_2$ -fold-  
164 change in expression was greater than zero in each of the old-biased modules (0.148 to 0.340) and less  
165 than zero within the young-biased modules (-0.376 to -0.249; Fig. S1). Four of the five old-biased  
166 modules (1, 2, 3 and 5) belonged to a larger cluster within the GCN, which is quite distant from the  
167 cluster containing the young-biased modules (6, 7, 8; Fig. 2). module\_4 (old-biased), on the other hand,  
168 forms a more distinct cluster, adjacent to the young-biased cluster. The old-biased modules contained  
169 several genes that had previously been identified as upregulated in old queens via standard differential  
170 expression analysis (Von Wychetzki *et al.*, 2015) but contained no genes that were upregulated in young  
171 queens. The opposite was true for young-biased modules, thus confirming the validity and compatibility  
172 of both methods (Fig. 2(b)).

173 However, importantly, the GCN analysis also allowed the identification of many additional age-related  
174 genes that can not be identified by standard differential expression analyses. For example, module\_1,  
175 which has the strongest association with old queens ( $\rho = 0.96$ ;  $p = 5.3 \times 10^{-8}$ ;  $\text{FDR} = 1.4 \times 10^{-6}$ ; Pearson  
176 correlation), contains 109 genes, of which only 41 are individually significantly differentially expressed  
177 between old and young queens. Similarly, module\_6, which is strongly negatively associated with old  
178 queens ( $\rho = -0.90$ ;  $p = 9.4 \times 10^{-6}$ ;  $\text{FDR} = 1.3 \times 10^{-4}$ ; Pearson correlation), contains 970 genes, of which  
179 240 were identified as individually significantly upregulated in young queens (Von Wychetzki *et al.*,  
180 2015). In the following section, we describe these eight age-biased modules in terms of their functional  
181 enrichment and detail the top hub genes (genes with the highest intramodular connectivity) within these  
182 modules.

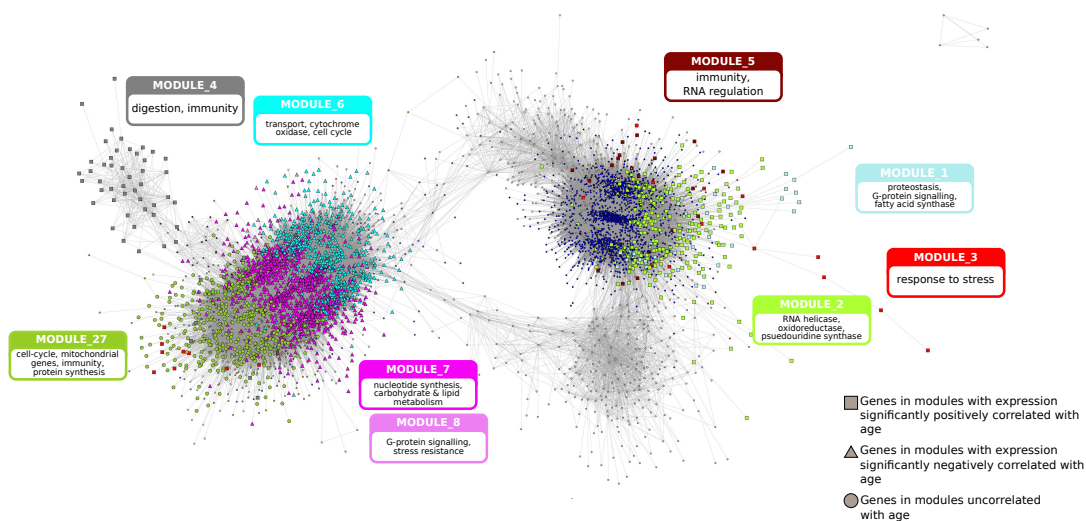

(a) GCN modules

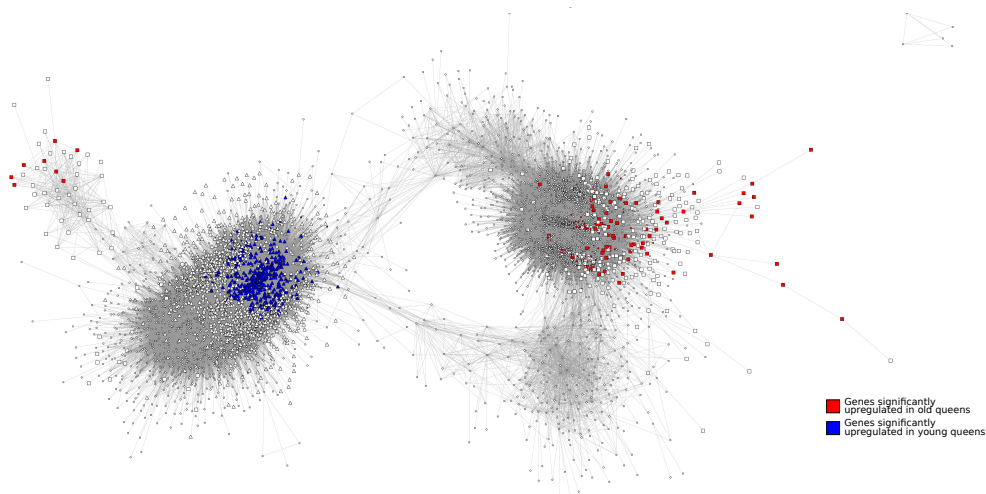

(b) Differentially expressed genes

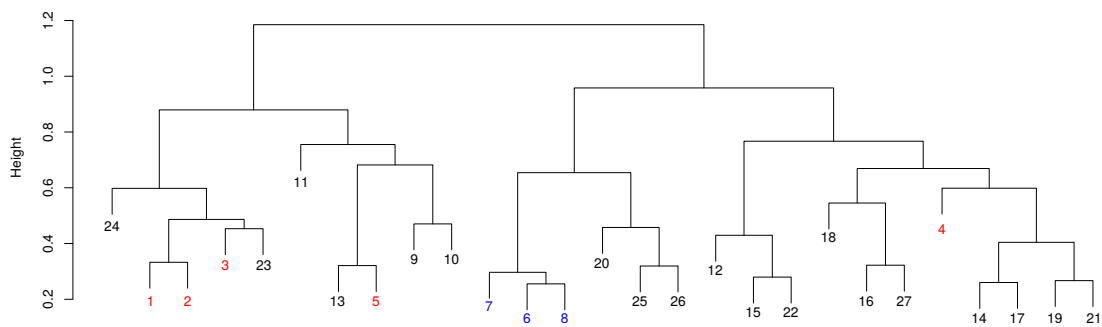

(c) Clustering of modules

**Figure 2:** Caption on next page.

**Figure 2:** (Previous page.) Gene co-expression network (GCN).

(a & b) Graphical representation of the gene co-expression network, containing only the most strongly connected genes ( $n = 5442$ ). In (a) genes are coloured according to the modules to which they belong. The main enriched functions (based on hubs and GO terms) of the 9 discussed modules are labelled (see text for more details). In (b) genes are coloured according to their differential expression; red: over-expressed in old queens; blue: over-expressed in young queens; white: not differentially expressed. In both representations, genes in modules significantly related to old queen expression are depicted as squares, and those significantly related to young queens are triangles; all other genes are represented by circles. (c) Clustering dendrogram of modules; height represents dissimilarity based on topological overlap. Modules significantly related to age are highlighted in red (positive correlation) and blue (negative correlation).

Higher resolution image available in the online version.

### 183 Old-biased modules

184 The most highly connected hub genes in *module\_1*, the module most strongly upregulated with age ( $\rho$   
185 = 0.96;  $p = 5.3 \times 10^{-8}$ ; FDR =  $1.4 \times 10^{-6}$ ; 109 genes; Fig. 3), include three genes with functions related to  
186 maintaining and restoring proteostasis in old queens (Table S3), the loss of which has been described as  
187 one of the hallmarks of ageing (López-Otín *et al.*, 2013). These are: a member of the TRAPP complex,  
188 important for protein transport, *Socs44A*, a gene involved in ubiquitination and *GRXCR1*, responsible  
189 for the post-transcriptional S-glutathionylation of proteins, a modification which is often triggered as a  
190 defence against oxidative stress (Dalle-Donne *et al.*, 2009). The top hubs of this module also include  
191 two genes which encode integral members of the G-protein signalling pathway, namely, a Rho guanine  
192 nucleotide exchange factor and a G-protein  $\alpha$ -subunit. The most connected gene within this hub is a  
193 fatty-acid synthase which may play an important role in colony communication. This module is enriched  
194 for a GO term related to the regulation of transcription (Table S4).

195 **Module\_2** (596 genes; upregulated with age:  $\rho = 0.65$ ;  $p = 0.012$ ; FDR = 0.080) contains hub genes  
196 coding for proteins with diverse functions, including an RNA helicase, a maternal protein, a protein with  
197 oxidoreductase activity and a pseudouridine synthase (Table S3).

198 **Module\_3** (433 genes; upregulated with age;  $\rho = 0.63$ ;  $p = 0.017$ ; FDR = 0.080) is particularly  
199 interesting since it is not only upregulated with age but, on average, gene members of the module are  
200 more strongly connected within old than in young queens (Fig. 3). Hub genes indicate this module is  
201 important for responses to age-related stress, especially processes related to a maintenance of proteostasis  
202 (Table S3). For instance, the top 10 hubs contain the endoplasmic reticulum (ER) stress protein, disulfide-  
203 isomerase, which reacts to protein misfolding and oxidative stress (Laurindo *et al.*, 2012), as well as *fringe*,  
204 which modulates Notch signalling, a pathway important for regulating tissue homeostasis and implicated  
205 in ageing related diseases (Balistreri *et al.*, 2016). A further hub is a trehalose transporter, orthologous  
206 to *tret1-2*, indicating that the transport of trehalose (the main haemolymph sugar in insects) from fat  
207 body to other tissues is well regulated in old queens (Kanamori *et al.*, 2010). This may have a positive

208 effect on survival, since trehalose treatment increases longevity in *C. elegans* (Honda *et al.*, 2010).

209 The top 10 hub genes in **module\_4** (186 genes;  $\rho = 0.61$ ;  $p = 0.021$ ; FDR = 0.080) fulfil various  
210 functions, such as the digestive enzymes alpha glucosidase and chymotrypsin-1, indicating a possible  
211 modification in diet with age (Table S3). The third most connected gene within this module is orthologous  
212 to *pirk* in *D. melanogaster* (involved in the negative regulation of the immune response; Kleino *et al.*  
213 2008), indicating the immune system may be downregulated with age in *C. obscurior*. Interestingly,  
214 long-lived flies also tend to downregulate the induction of immune effector genes (Fabian *et al.*, 2018;  
215 Loch *et al.*, 2017). This module is enriched for the GO term transmembrane transport (Table S4).

216 **Module\_5** (169 genes;  $\rho = 0.58$ ;  $p = 0.028$ ; FDR = 0.095) may be important for controlling the  
217 immune system since two hub genes (Table S3), the COMM domain containing protein 8 (COMMD8)  
218 and the WD40 domain containing angio-associated migratory cell protein (AAMP), are both known to  
219 inhibit the transcription factor NF- $\kappa$ -B (Burstein *et al.*, 2005; Bielig *et al.*, 2009). An upregulation of NF-  
220  $\kappa$ -B occurs with ageing and its inhibition, as apparently occurs within this module, can reduce the effects  
221 of senescence (Tilstra *et al.*, 2012). Interestingly, COMMD8 is also characterised by a strong increase in  
222 connectivity (1.68 fold change), indicating its heightened importance in old queens. Further functions of  
223 this module may be related to RNA regulation, as evidenced by the hub gene *eyes.absent*, a transcription  
224 factor with importance in embryonal eye development in *D. melanogaster* (Bonini *et al.*, 1998). Based on  
225 the ten nearest neighbours in the *C. obscurior* GCN, *eyes.absent* may regulate several enzymes involved  
226 in post-transcriptional processes, such as mRNA export from the nucleus (*sbr*, Cobs\_03187), and tRNA  
227 modification (*Tgt*: Cobs\_16650; *HisRS*: Cobs\_01013; CG3808: Cobs\_18201).

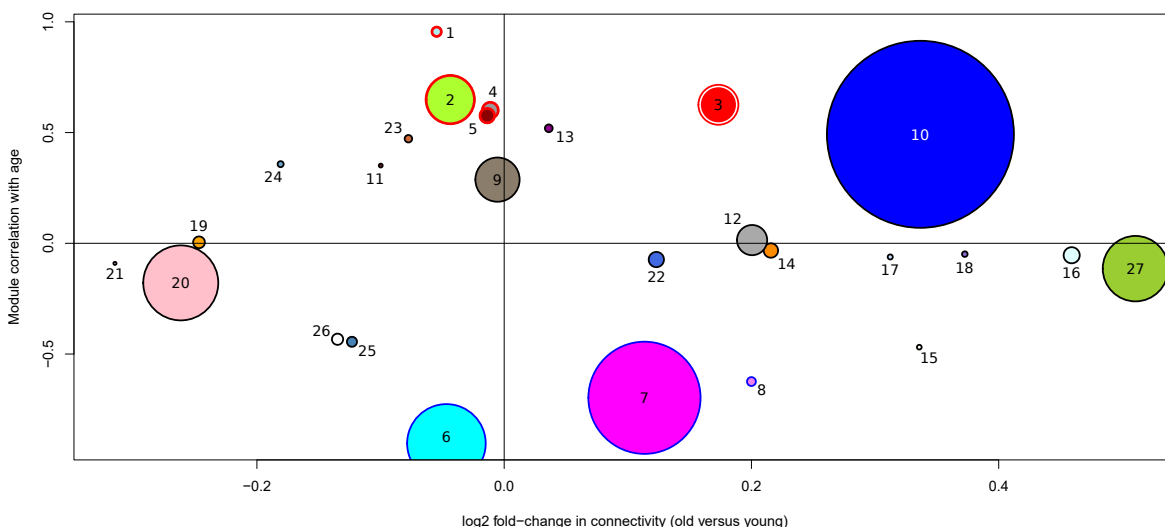

**Figure 3: Correlation of GCN modules with age and their change in connectivity between old and young queens.** A positive correlation with age (*y*-axis) signifies an upregulation of a module in old queens. A positive log<sub>2</sub>foldchange in connectivity (*x*-axis) represents a higher connectivity in old queens. Modules are labelled with their assigned module numbers. Sizes of dots represent relative number of genes within modules. Modules with red outlines are significantly upregulated and modules with blue outlines are significantly downregulated in old queens compared to young queens.

### 228 Modules downregulated with age

229 **Module\_6** (970 genes) is the module most strongly down-regulated with age ( $\rho = -0.9$ ;  $p = 9.4 \times 10^{-6}$ ;  
230  $FDR = 1.3 \times 10^{-4}$ ) and is enriched for the GO terms transmembrane transport and potassium ion transport  
231 (Table S4). Interestingly, the top 10 hubs contain three genes with no detectable homology to any protein  
232 in the uniprot arthropod database (Table S3). Otherwise, the functions of hub genes in this module span  
233 various functions, such as cell-cell interactions, cytochrome oxidase, an odorant receptor and a negative  
234 regulator of the cell cycle.

235 **Module\_7** (1385 genes;  $\rho = -0.7$ ;  $p = 0.006$ ;  $FDR = 0.050$ ) has several enriched functions in the  
236 nucleotide synthetic process, oxidoreductase activity, carbohydrate and lipid metabolism, ATP metabolic  
237 processes, cofactor and coenzyme binding (Table S4). Accordingly the top hubs in this module contain  
238 a thioredoxin, a proteasome subunit ( $\alpha 6$ ) and two genes involved in ubiquitination (*STUB1* and *Ubc6*;  
239 Table S3).

240 **Module\_8** (103 genes;  $\rho = -0.62$ ;  $p = 0.018$ ;  $FDR = 0.080$ ) is enriched for the function G-protein  
241 coupled receptor activity (Table S4). The top hub gene in this module (intraconnectivity 0.90), *Cobs\_08138*,  
242 is orthologous to the

243 (Friedrich and Jones, 2016). Interestingly, mutant flies, carrying P-element insertions in one of these  
244 *methuselah* genes, live 35% longer and are significantly more resistant to stresses than wild-types (Lin  
245 et al., 1998). There are indications that these effects on lifespan and stress response may represent the  
246 ancestral function of methuselah receptors in *Drosophila* (Araújo et al., 2013). A similar function of the  
247 *methuselah* ortholog in *C. obscurior* would explain how a reduction in expression within older queens  
248 may facilitate life extension and greater stress resistance.

249 We also examined **module\_27** (808 genes) in more detail since it shows the strongest increase in  
250 connectivity in old compared to young queens (1.47 fold) of all modules (Fig. 3), suggesting an increased  
251 regulation of this module with age. The functions connected to this module, based on hubs (Table S3),  
252 increases in connectivity (Table S5) and GO terms (Table S4), indicate that in old queens an increased  
253 regulation of cell-cycle, mitochondrial genes, immunity genes, transcriptional genes and members of the  
254 protein synthesis machinery takes place, which is in stark contrast to the expected gene expression  
255 hallmarks of ageing in multicellular eukaryotes (Frenk and Houseley, 2018).

## 256 **Robustness of GCN**

257 Since our sample size of 14 is one lower than the recommended minimum of 15, we confirmed the ro-  
258 bustness of our results by adding further samples from the same study (Von Wychetzki et al., 2015).  
259 For this, we incorporated expression data from 7 old queen samples that had mated with sterile males  
260 ('sham-mated') and then created 8 further GCNs, 7 of which contained one sham-mated queen (total  
261  $n = 15$ ) and one GCN containing all 7 sham-mated queens ( $n = 21$ ). We used preservation statistics  
262 (Langfelder et al., 2011) to compare the modules of our GCN with these larger GCNs. Within each  
263 module, correlation, adjacency, connectivity and variance explained by the eigennode are compared be-  
264 tween all nodes, and for each statistic a z-score is calculated based on 200 permutations. A composite  
265 z-summary of these statistics is calculated, whereby a threshold of 2 is deemed as necessary for classing a  
266 module as preserved, while a score greater than 10 offers strong evidence for module preservation. In each  
267 comparison against the 8 additional, larger GCNs, our age-biased modules scored at least 10, offering  
268 strong support that our GCN is not affected by a limited sample size.

## 269 *Old-biased module hubs are highly conserved*

270 We investigated evolutionary rates of the most connected genes within the old- and young-biased modules.  
271 Hub genes (intraconnectivity > 50%) of the five old-biased modules have significantly lower rates of protein  
272 evolution (dN/dS median: 0.081) than hubs in young-biased modules (median: 0.118;  $p = 6.0 \times 10^{-4}$ ) or  
273 compared to all lowly connected genes (intraconnectivity < 50%; median: 0.101;  $p = 0.017$ ; Fig. 4). We

274 investigated the influence of expression levels on these results, since highly expressed genes are often found  
275 to be under stronger purifying selection (Drummond *et al.*, 2005). However, expression levels, based on  
276 mean normalised read counts among all 14 samples, do not differ between hub genes of old-biased (mean:  
277 291.5) and young-biased genes (mean: 326.8;  $W = 3160$ ,  $p$ -value = 0.18). These results suggest the hub  
278 genes of old-biased modules are highly constrained by strong purifying selection.

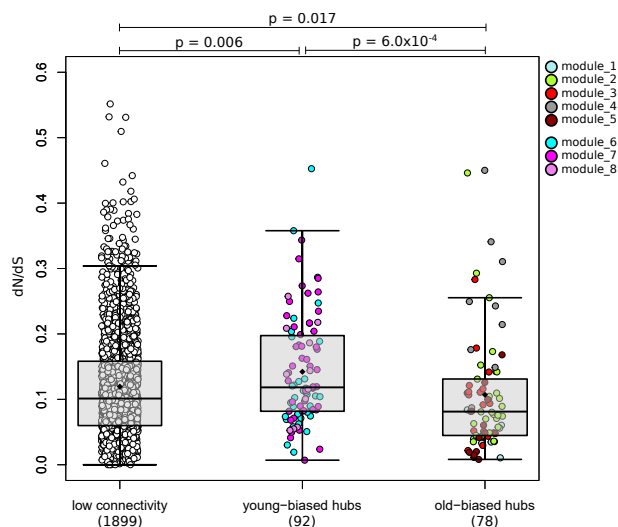

**Figure 4:** dN/dS rates in hub genes within young- and old-biased modules compared to lowly connected genes. Each dot represents a gene, which are coloured by the module membership. Whiskers of the boxplots represent up to 1.5 times the interquartile range. Black diamonds are means, and horizontal bars within the boxes are medians.

Hub genes have an intraconnectivity > 50%; lowly connected: < 50%.

## 279 Conclusions

280 Evolutionary theory of ageing predicts a selection shadow on genes expressed late in life due to a reduc-  
281 tion in effective population size with increasing age caused by extrinsic mortality (Kirkwood and Austad,  
282 2000). We expected to find a reduced selection shadow in *C. obscurior* queens, as ant queens generally  
283 experience low extrinsic mortality. In support, we find compelling evidence for strong purifying selection  
284 on old-biased genes (significantly upregulated in 7 old compared to 7 young queens), for which evolu-  
285 tionary rates (dN/dS) are significantly lower than young-biased genes. In contrast, we find evidence of a  
286 selection shadow in *D. melanogaster* where dN/dS is significantly higher for old-biased genes. Our results  
287 suggest, therefore, that *C. obscurior* queens are not affected by a selection shadow, so that genes impor-  
288 tant at old age can not be expected to accumulate deleterious mutations at an increased rate compared to  
289 early-acting genes. This offers an explanation for the apparent lack of ageing and the high reproductive  
290 output of old ant queens.

291 Furthermore, we were interested in understanding whether *C. obscurior* queens show signs of ageing,  
292 especially within transcriptional regulation. This is a particularly intriguing question since the repro-  
293 ductive fitness of these ant queens remains high until old age, although they outlive their sterile siblings  
294 (Oettler and Schrempf, 2016). In fact, our analysis of co-expression networks in *C. obscurior* queens un-  
295 covers a significant increase in gene connectivity in old queens. This result offers evidence for an increased  
296 transcriptional regulation, especially in genes that are themselves involved in transcriptional regulation, as  
297 well as several genes involved in protein synthesis and degradation, which are important mechanisms for  
298 counteracting symptoms of ageing (Frenk and Houseley, 2018). Also, the analysis of old-biased modules  
299 (clusters of highly correlated genes, upregulated with age) within the GCN revealed an increase in ex-  
300 pression and connectivity of genes involved in proteostasis, stress response, and transcriptional regulation  
301 (Fig. 2(a)), offering further support for well-regulated anti-ageing mechanisms. The hub genes within  
302 these old-biased modules are more highly conserved than hubs of young-biased modules, indicating strong  
303 purifying selection acting on these important central regulators.

304 In summary, we find no evidence of ageing in transcriptional regulation in *C. obscurior* queens. Low  
305 extrinsic mortality may allow selection to shape genes important at old age, which is evident in low  
306 divergence rates (dN/dS) of the hubs of old-biased modules. Well regulated molecular mechanisms likely  
307 allow the ant queens to counteract any symptoms of ageing, thus maintaining high reproductive fitness  
308 throughout life. We suggest further transcriptional studies into the short period directly before death  
309 when the reproductive output of *C. obscurior* queens decreases (Heinze and Schrempf, 2012; Kramer  
310 *et al.*, 2015), which we expect to illuminate processes of transcriptional ageing. Transcriptional studies  
311 of other ant species are necessary to investigate the generality of our findings. In monogynous ants, for  
312 example, in which individual queens are less dispensible, we would expect to observe an even weaker  
313 selection shadow. Also, *C. obscurior* queens are relatively short-lived compared to other ant species.  
314 Selection strength on age-biased genes of extremely long-lived queens may be less affected by reductions  
315 in effective population sizes due to longer generation times. Further detailed research on individual  
316 pathways is important to understand how an upregulation of anti-ageing mechanisms occurs; especially  
317 proteomic analyses may reveal the true relationships between pathway members.

## 318 Methods

### 319 *Data set*

320 Genome and proteome sequences of the *C. obscurior* genome, version 1.4, were obtained from the hy-  
321 menopteragenome.org website (accessed July 2018; Elsik *et al.* 2015). We estimated gene functions based  
322 on orthology, primarily to *D. melanogaster*, as well as PFAM domains and GO terms. Putative protein



323 functions were based on descriptions in the flybase (Thurmond et al., 2018) and UniProt (Consortium,  
324 2018) databases, unless otherwise stated. We calculated orthology to *D. melanogaster* with the method of  
325 reciprocal best blast hit (Rivera et al., 1998). For this, the proteomes of *C. obscurior* and *D. melanogaster*  
326 (v. 6.21; obtained from [ftp://ftp.flybase.net/releases/current/dmel\\_r6.21/fasta/](ftp://ftp.flybase.net/releases/current/dmel_r6.21/fasta/); accessed  
327 June 2018) were blasted against each other using blastp (BLAST 2.7.1+; Camacho et al. 2009) and  
328 an e-value threshold of  $1e^{-5}$ . Reciprocal best blast hits were extracted from the output files using a  
329 custom perl script. Where no orthology could be detected using this method, protein sequences were  
330 blasted against the swissprot database with blastp (version 2.7.1+; Altschul et al. 1990) and the best  
331 hit was retained with an evalue  $< 0.05$ . Protein sequences were annotated with PFAM domains using  
332 pfamscan (Mistry et al., 2007), to which GO terms were mapped with pfam2GO (Mitchell et al., 2014).

333 Published RNAseq data were obtained for 7 old (18 weeks) and 7 young (4 weeks) ant queens from  
334 NCBI (Von Wychetzki et al., 2015). These queens had each been individually reared from pupal stage  
335 in separate experimental colonies, each containing 20 workers and 10 larvae, originating from the genome  
336 reference population in Bahia, Brazil (Von Wychetzki et al., 2015; Schrader et al., 2014). Fastq files were  
337 mapped to the *C. obscurior* genome (version 1.4) with hisat2 (Kim et al., 2019) using default parameters.  
338 We then indexed and sorted sam files using samtools (version 1.7, Li et al. 2009) and generated counts  
339 per gene using htseq-count (Anders et al., 2015). All statistical analyses on these counts were carried  
340 out in R (version 3.5.1, R Core Team 2018). Where necessary, we corrected for multiple testing with the  
341 `p.adjust` function, using the `fdr` method (Benjamini and Hochberg, 1995). A total of 10 339 genes were  
342 expressed in at least two individuals with a read count of at least 10. This subset of genes was used for  
343 all analyses.

#### 344 *Determining age-biased expression*

345 Within this subset of 10 339 genes, we identified genes with age-biased expression by comparing expression  
346 in the 7 old to the 7 young samples. This was carried out with the R package DESeq2 at default settings  
347 (Love et al., 2014). Genes with an adjusted p-value  $< 0.05$  were deemed either old- or young-biased. All  
348 other genes were classified as unbiased.

#### 349 *Molecular evolution and selection analyses*

350 In order to carry out evolutionary analyses, we first determined orthology between the proteomes of  
351 *C. obscurior* and 9 further ant species, which we either downloaded from the hymenopteragenome.org  
352 website (accessed August 2020; Elsik et al. 2015): *Atta cephalotes*, *Pogonomyrmex barbatus*, *Solonopsis*  
353 *invicta* and *Wasmannia auropunctata*; or NCBI (accessed August 2020): *Monomorium pharaonis*,

354 *Temnothorax curvispinosus*, *Temnothorax longispinosus*, *Vollenhovia emeryi*. Data for *Crematogaster levior*  
355 were obtained from the authors of the genome publication upon request (Hartke et al., 2019). Orthology  
356 was determined with OrthoFinder (Emms and Kelly, 2015) at default settings. We chose orthologous  
357 groups that contained single gene copies within each of the 10 species. Protein sequences of each ortholog  
358 set were aligned with prank (version 170427, Löytynoja 2014) at default settings. The corresponding  
359 CDS sequences were aligned using pal2nal (Suyama et al., 2006). CDS alignments were trimmed for  
360 poorly aligned codon positions with Gblocks (version 0.91b) with the following parameters: -t=c -b2=6  
361 -b3=100000 -b4=1 -b5=h. We calculated dN/dS ratios using the null model of codeml in the PAML  
362 suite (Yang, 1997), using the following tree based on a published ant phylogeny (Ward et al., 2015):

363 (((((((Tlon,Tcur),Clev),Veme),Cobs),(Waur,Acep)),(Mpha,Sinv)),Pbar)

364 dN/dS ratios were used for analyses only if dS < 3. dN/dS ratios were compared between old-biased,  
365 young-biased and unbiased genes using the Mann-Whitney test with the R function *wilcox.test*.

366 In order to detect genes that contain codon sites under positive selection, we performed a likelihood-  
367 ratio test (LRT) between models 7 (null hypothesis; dN/dS limited between 0 and 1) and 8 (alternative  
368 hypothesis; additional parameter allows dN/dS > 1) of the codeml program within the PAML suite  
369 (Yang, 1997). For this we used runmode 0, model 0 and set 'NSsites' to 7 & 8.

### 370 *Gene co-expression analysis*

371 The expression counts data were normalised using the built-in median of ratios method implemented  
372 by default in DESeq2 (version 1.22.2, Love et al. 2014) and then transposed to a matrix containing  
373 genes in columns and samples in rows. With the reduced set of 10 339 genes, we created a signed  
374 weighted gene co-expression network using the WGCNA package (version 1.68, Langfelder and Horvath  
375 2008) that incorporated expression values from all 14 queen samples (7 young and 7 old). We followed  
376 the standard stepwise protocol ([https://horvath.genetics.ucla.edu/html/CoexpressionNetwork/  
377 Rpackages/WGCNA/Tutorials/](https://horvath.genetics.ucla.edu/html/CoexpressionNetwork/Rpackages/WGCNA/Tutorials/)), using a soft power of 14 and the biweight midcorrelation function for  
378 calculating coexpression similarity. Minimum module size was set at 30 and resulting modules with  
379 a correlation of at least 0.75 were merged. Hub genes within modules were determined based on the  
380 intra-modular connectivity, which we calculated with the `intramodularConnectivity` function on the  
381 adjacency matrix, that was produced during the WGCNA pipeline. Age-biased modules were identified  
382 by correlating (pearson) the eigengene of each module with the binary trait young/old. FDRs were  
383 calculated with the `p.adjust` function, and modules with an FDR < 0.1 were considered significantly  
384 related to age.

385 To compare connectivity between young and old queens, we calculated connectivity with the

386 `softConnectivity` function separately within the young and the old queen expression data. We used  
387 the same soft power value of 14 and the biweight midcorrelation function.

388 To create a visualisation of the GCN, the topological overlap matrix was reduced to only contain genes  
389 with a topological overlap of at least 0.1 to at least one other gene. Edge and node files were created with  
390 the WGCNA function `exportNetworkToCytoscape`, using a threshold of 0.1. All further visualisations  
391 of the network were conducted in Cytoscape (v. 3.7.2, Shannon *et al.* 2003).

392 To test the robustness of our GCN, we created 7 additional GCNs each with one extra sample taken  
393 from the sham-mated queens previously published within the same data set as our main data used here  
394 (Von Wychetzki *et al.*, 2015). We also created one larger GCN containing all 7 sham-mated queens, there-  
395 fore containing 21 samples. Each additional GCN was created with the same parameters as our original  
396 GCN and then compared to our original GCN with the built-in WGCNA-function, `modulePreservation`  
397 and the `Zsummary` statistic was calculated. This composite z-score combines several comparative statis-  
398 tics, such as adjacency, connectivity and proportion of variance explained, with a score of 10 suggested  
399 as a threshold for strong evidence of module preservation (Langfelder *et al.*, 2011).

#### 400 *GO enrichment*

401 GO term enrichment analyses were carried out with topGO (version 2.34.0; Alexa and Rahnenfuhrer  
402 2018) on the "biological process" category, using the classic algorithm. Node size was set to 5, Fisher  
403 statistic was implemented and we only kept GO terms that matched at least 3 genes and with a p-value <  
404 0.05. An FDR was added using the R function `p.adjust` and the method "fdr" (Benjamini and Hochberg,  
405 1995); GO terms with an FDR < 0.1 were described in the text.

#### 406 *D. melanogaster data set*

407 To estimate evidence of a selection shadow in

408 *D. melanogaster*, we accessed a recently compiled, but so far unpublished, RNAseq data set (SRA  
409 accession: PRJNA615318). This data set comprised RNAseq of 34 samples of 5 pooled flies. We used  
410  $y^1, w^{1118}$  mutant flies (full genotype:  $yw; +/+; +/+$ ). These flies were maintained in laboratory conditions  
411 at 25°C, 12h:12h light:dark and 60% relative humidity.

#### 412 **Experimental setup**

413 Adult virgin females and males were collected separately, and 3 days later they were pooled together  
414 to freely mate. Eggs were laid in a controlled density (50-100 eggs per bottle) and developed until the  
415 adult stage in the same conditions as mentioned above. After eclosion, the offspring adult flies matured  
416 for one day. On the second day after eclosion, female and male flies were collected and transferred to a

417 demographic cage. Each cage contained 130 females and 70 males. Once cages were set up, they were  
418 divided into four groups, which consisted of 4 different diet treatments. The diet treatments differed only  
419 in the content of yeast (20, 40, 80 or 120g) present in the fly food; the other ingredients were added in the  
420 same quantities in all diets (1L water, 7g agar, 50g sugar, 10mL 20% nipagin and 6mL propionic acid).  
421 All cages were maintained in the same conditions as described above.

#### 422 **Sampling and RNA extractions**

423 Female flies were sampled at two time points: 10 days (young) and 38 days (old). For each time point,  
424 sampling and dissections were done between 1 pm and 6 pm. Two groups of 5 females each (2 replicates)  
425 were anesthetized in the fridge (approximately 4°C), and afterwards fat bodies were dissected in ice-cold  
426 1x PBS. To guarantee that we sampled the entire fat body, we decided to use in this experiment fat  
427 bodies still attached to the cuticle – usually referred to as fat body enriched samples – because the cuticle  
428 is transcriptionally inactive. In ice-cold PBS, the female fly abdomens were opened, and the organs were  
429 carefully removed. Once the fat body tissue was clean, the abdomen cuticle was separated from the  
430 thorax. The fat body enriched tissues were transferred into Eppendorf with 200µL of homogenization  
431 buffer from the RNA isolation kit (MagMAX™-96 Total RNA Isolation Kit from Thermo Fisher). The  
432 tissues were homogenized and stored at -80°C until RNA extraction. To sample head transcriptomes,  
433 flies were transferred to Eppendorfs and snap-frozen with liquid nitrogen. Then the Eppendorfs were  
434 vigorously shaken to separate the heads from the bodies. The heads were then transferred into an  
435 Eppendorf containing 200µL of homogenization buffer, from the RNA isolation kit. As described above,  
436 tissues were homogenized in the solution and kept at -80°C until RNA extraction. All extractions were  
437 done using the MagMax robot from Thermo Fisher and the MagMAX™-96 Total RNA Isolation Kit. In  
438 this experiment there is a total of 34 samples: 2 time points X 4 diet treatments x 2 tissues = 16 groups,  
439 for each group we have 2-3 replicates (all groups have 2 replicates except for the second time point for  
440 2% yeast diet, where we have 3 replicates). The sequencing of the RNA samples was done in BGI, Hong  
441 Kong, China. The samples were sequenced (paired-end, 100bp) on an Illumina HiSeq 4000 platform.  
442 Gene counts were generated in the same manner as for *C. obscurior* using genome version 6.21 (obtained  
443 from [ftp://ftp.flybase.net/releases/current/dmel\\_r6.21/fasta/](ftp://ftp.flybase.net/releases/current/dmel_r6.21/fasta/); accessed June 2018).

## 444 References

- 445 Aamodt, R. M. (2009). Age-and caste-dependent decrease in expression of genes maintaining dna and rna  
446 quality and mitochondrial integrity in the honeybee wing muscle. *Experimental Gerontology*, 44(9):586–  
447 593.
- 448 Alexa, A. and Rahnenfuhrer, J. (2018). *topGO: Enrichment Analysis for Gene Ontology*. R package  
449 version 2.34.0.
- 450 Altschul, S. F., Gish, W., Miller, W., Myers, E. W., and Lipman, D. J. (1990). Basic local alignment  
451 search tool. *Journal of molecular biology*, 215(3):403–410.
- 452 Anders, S., Pyl, P. T., and Huber, W. (2015). Htseq—a python framework to work with high-throughput  
453 sequencing data. *Bioinformatics*, 31(2):166–169.
- 454 Araújo, A. R., Reis, M., Rocha, H., Aguiar, B., Morales-Hojas, R., Macedo-Ribeiro, S., Fonseca, N. A.,  
455 Reboiro-Jato, D., Reboiro-Jato, M., Fdez-Riverola, F., et al. (2013). The drosophila melanogaster  
456 methuselah gene: a novel gene with ancient functions. *PloS one*, 8(5):e63747.
- 457 Aurori, C. M., Buttstedt, A., Dezmirean, D. S., Mărghitaş, L. A., Moritz, R. F., and Erler, S. (2014).  
458 What is the main driver of ageing in long-lived winter honeybees: antioxidant enzymes, innate immu-  
459 nity, or vitellogenin? *Journals of Gerontology Series A: Biomedical Sciences and Medical Sciences*,  
460 69(6):633–639.
- 461 Balistreri, C. R., Madonna, R., Melino, G., and Caruso, C. (2016). The emerging role of notch pathway  
462 in ageing: focus on the related mechanisms in age-related diseases. *Ageing research reviews*, 29:50–65.
- 463 Benjamini, Y. and Hochberg, Y. (1995). Controlling the false discovery rate: a practical and power-  
464 ful approach to multiple testing. *Journal of the Royal statistical society: series B (Methodological)*,  
465 57(1):289–300.
- 466 Bielig, H., Zurek, B., Kutsch, A., Menning, M., Philpott, D., Sansonetti, P., and Kufer, T. (2009). A  
467 function for aamp in nod2-mediated nf- $\kappa$ b activation. *Molecular immunology*, 46(13):2647–2654.
- 468 Bonini, N. M., Leiserson, W. M., and Benzer, S. (1998). Multiple roles of theeyes absentgene indrosophila.  
469 *Developmental biology*, 196(1):42–57.

- 470 Burstein, E., Hoberg, J. E., Wilkinson, A. S., Rumble, J. M., Csomos, R. A., Komarck, C. M., Maine,  
471 G. N., Wilkinson, J. C., Mayo, M. W., and Duckett, C. S. (2005). Commd proteins, a novel family of  
472 structural and functional homologs of murr1. *Journal of Biological Chemistry*, 280(23):22222–22232.
- 473 Calderwood, S. K., Murshid, A., and Prince, T. (2009). The shock of aging: molecular chaperones and  
474 the heat shock response in longevity and aging—a mini-review. *Gerontology*, 55(5):550–558.
- 475 Camacho, C., Coulouris, G., Avagyan, V., Ma, N., Papadopoulos, J., Bealer, K., and Madden, T. L.  
476 (2009). Blast+: architecture and applications. *BMC bioinformatics*, 10(1):421.
- 477 Carlson, M. R., Zhang, B., Fang, Z., Mischel, P. S., Horvath, S., and Nelson, S. F. (2006). Gene connec-  
478 tivity, function, and sequence conservation: predictions from modular yeast co-expression networks.  
479 *BMC genomics*, 7(1):40.
- 480 Consortium, D. . G. et al. (2007). Evolution of genes and genomes on the drosophila phylogeny. *Nature*,  
481 450(7167):203.
- 482 Consortium, U. (2018). Uniprot: a worldwide hub of protein knowledge. *Nucleic acids research*,  
483 47(D1):D506–D515.
- 484 Corona, M., Hughes, K. A., Weaver, D. B., and Robinson, G. E. (2005). Gene expression patterns  
485 associated with queen honey bee longevity. *Mechanisms of ageing and development*, 126(11):1230–  
486 1238.
- 487 Corona, M., Velarde, R. A., Remolina, S., Moran-Lauter, A., Wang, Y., Hughes, K. A., and Robin-  
488 son, G. E. (2007). Vitellogenin, juvenile hormone, insulin signaling, and queen honey bee longevity.  
489 *Proceedings of the National Academy of Sciences*, 104(17):7128–7133.
- 490 Dalle-Donne, I., Rossi, R., Colombo, G., Giustarini, D., and Milzani, A. (2009). Protein s-  
491 glutathionylation: a regulatory device from bacteria to humans. *Trends in biochemical sciences*,  
492 34(2):85–96.
- 493 Drummond, D. A., Bloom, J. D., Adami, C., Wilke, C. O., and Arnold, F. H. (2005). Why highly  
494 expressed proteins evolve slowly. *Proceedings of the National Academy of Sciences*, 102(40):14338–  
495 14343.
- 496 Elsik, C. G., Tayal, A., Diesh, C. M., Unni, D. R., Emery, M. L., Nguyen, H. N., and Hagen, D. E.  
497 (2015). Hymenoptera genome database: integrating genome annotations in hymenopteramine. *Nucleic*  
498 *acids research*, 44(D1):D793–D800.

- 499 Elsner, D., Meusemann, K., and Korb, J. (2018). Longevity and transposon defense, the case of termite  
500 reproductives. *Proceedings of the National Academy of Sciences*, 115(21):5504–5509.
- 501 Emms, D. M. and Kelly, S. (2015). Orthofinder: solving fundamental biases in whole genome comparisons  
502 dramatically improves orthogroup inference accuracy. *Genome biology*, 16(1):157.
- 503 Fabian, D. K., Garschall, K., Klepsatel, P., Kapun, M., Lemaitre, B., Schl, C., Arking, R., and Flatt, T.  
504 (2018). Evolution of longevity improves immunity in *Drosophila*. *Evolution Letters*, 00(0):1–13.
- 505 Flatt, T. and Partridge, L. (2018). Horizons in the evolution of aging. *BMC biology*, 16(1):1–13.
- 506 Frenk, S. and Houseley, J. (2018). Gene expression hallmarks of cellular ageing. *Biogerontology*, 19(6):547–  
507 566.
- 508 Friedrich, M. and Jones, J. W. (2016). Gene ages, nomenclatures, and functional diversification of the  
509 methuselah/methuselah-like gpcr family in *drosophila* and *tribolium*. *Journal of Experimental Zoology*  
510 *Part B: Molecular and Developmental Evolution*, 326(8):453–463.
- 511 Gems, D. and Partridge, L. (2013). Genetics of longevity in model organisms: debates and paradigm  
512 shifts. *Annual review of physiology*, 75:621–644.
- 513 Hartke, J., Schell, T., Jongepier, E., Schmidt, H., Sprenger, P. P., Paule, J., Bornberg-Bauer, E., Schmitt,  
514 T., Menzel, F., Pfenninger, M., et al. (2019). Hybrid genome assembly of a neotropical mutualistic  
515 ant. *Genome biology and evolution*, 11(8):2306–2311.
- 516 Heinze, J. and Schrepf, A. (2012). Terminal investment: individual reproduction of ant queens increases  
517 with age. *PLoS One*, 7(4).
- 518 Honda, Y., Tanaka, M., and Honda, S. (2010). Trehalose extends longevity in the nematode *caenorhab-*  
519 *ditis elegans*. *Aging cell*, 9(4):558–569.
- 520 Jia, K., Cui, C., Gao, Y., Zhou, Y., and Cui, Q. (2018). An analysis of aging-related genes derived from  
521 the genotype-tissue expression project (gtex). *Cell death discovery*, 4(1):1–14.
- 522 Jones, O. R., Scheuerlein, A., Salguero-Gómez, R., Camarda, C. G., Schaible, R., Casper, B. B., Dahlgren,  
523 J. P., Ehrlén, J., García, M. B., Menges, E. S., et al. (2014). Diversity of ageing across the tree of life.  
524 *Nature*, 505(7482):169.
- 525 Kanamori, Y., Saito, A., Hagiwara-Komoda, Y., Tanaka, D., Mitsumasu, K., Kikuta, S., Watanabe,  
526 M., Cornette, R., Kikawada, T., and Okuda, T. (2010). The trehalose transporter 1 gene sequence is

- 527 conserved in insects and encodes proteins with different kinetic properties involved in trehalose import  
528 into peripheral tissues. *Insect biochemistry and molecular biology*, 40(1):30–37.
- 529 Keller, L. and Genoud, M. (1997). Extraordinary lifespans in ants : a test of evolutionary theories of  
530 ageing. *Nature*, 389(October):3–5.
- 531 Kenyon, C. J. (2010). The genetics of ageing. *Nature*, 464(7288):504.
- 532 Kim, D., Paggi, J. M., Park, C., Bennett, C., and Salzberg, S. L. (2019). Graph-based genome alignment  
533 and genotyping with hisat2 and hisat-genotype. *Nature biotechnology*, 37(8):907–915.
- 534 Kirkwood, T. B. (1977). Evolution of ageing. *Nature*, 270(5635):301–304.
- 535 Kirkwood, T. B. and Austad, S. N. (2000). Why do we age? *Nature*, 408(6809):233.
- 536 Kleino, A., Myllymaki, H., Kallio, J., Vanha-aho, L.-M., Oksanen, K., Ulvila, J., Hultmark, D., Valanne,  
537 S., and Ramet, M. (2008). Pirk Is a Negative Regulator of the Drosophila Imd Pathway. *The Journal*  
538 *of Immunology*, 180(8):5413–5422.
- 539 Koga, H., Kaushik, S., and Cuervo, A. M. (2011). Protein homeostasis and aging: The importance of  
540 exquisite quality control. *Ageing research reviews*, 10(2):205–215.
- 541 Kramer, B. H., Schrempf, A., Scheuerlein, A., and Heinze, J. (2015). Ant colonies do not trade-off  
542 reproduction against maintenance. *PLoS One*, 10(9):e0137969.
- 543 Kruegel, U., Robison, B., Dange, T., Kahlert, G., Delaney, J. R., Kotireddy, S., Tsuchiya, M.,  
544 Tsuchiyama, S., Murakami, C. J., Schleit, J., et al. (2011). Elevated proteasome capacity extends  
545 replicative lifespan in *saccharomyces cerevisiae*. *PLoS genetics*, 7(9):e1002253.
- 546 Kuhn, J. M. M., Meusemann, K., and Korb, J. (2019). Long live the queen, the king and the commoner?  
547 transcript expression differences between old and young in the termite *cryptotermes secundus*. *PloS*  
548 *one*, 14(2):e0210371.
- 549 Langfelder, P. and Horvath, S. (2008). Wgcna: an r package for weighted correlation network analysis.  
550 *BMC bioinformatics*, 9(1):559.
- 551 Langfelder, P., Luo, R., Oldham, M. C., and Horvath, S. (2011). Is my network module preserved and  
552 reproducible? *PLoS Comput Biol*, 7(1):e1001057.
- 553 Laurindo, F. R., Pescatore, L. A., and de Castro Fernandes, D. (2012). Protein disulfide isomerase in  
554 redox cell signaling and homeostasis. *Free Radical Biology and Medicine*, 52(9):1954–1969.



- 555 Lee, B.-H., Lee, M. J., Park, S., Oh, D.-C., Elsasser, S., Chen, P.-C., Gartner, C., Dimova, N., Hanna, J.,  
556 Gygi, S. P., et al. (2010). Enhancement of proteasome activity by a small-molecule inhibitor of usp14.  
557 *Nature*, 467(7312):179.
- 558 Li, H., Handsaker, B., Wysoker, A., Fennell, T., Ruan, J., Homer, N., Marth, G., Abecasis, G., and  
559 Durbin, R. (2009). The sequence alignment/map format and samtools. *Bioinformatics*, 25(16):2078–  
560 2079.
- 561 Lin, Y.-J., Seroude, L., and Benzer, S. (1998). Extended life-span and stress resistance in the drosophila  
562 mutant methuselah. *Science*, 282(5390):943–946.
- 563 Loch, G., Zinke, I., Mori, T., Carrera, P., Schroer, J., Takeyama, H., and Hoch, M. (2017). Antimicrobial  
564 peptides extend lifespan in *Drosophila*. *PLoS ONE*, 12(5):1–15.
- 565 Lockett, G. A., Almond, E. J., Huggins, T. J., Parker, J. D., and Bourke, A. F. (2016). Gene expression  
566 differences in relation to age and social environment in queen and worker bumble bees. *Experimental*  
567 *gerontology*, 77:52–61.
- 568 López-Otín, C., Blasco, M. A., Partridge, L., Serrano, M., and Kroemer, G. (2013). The hallmarks of  
569 aging. *Cell*, 153(6):1194–1217.
- 570 Love, M. I., Huber, W., and Anders, S. (2014). Moderated estimation of fold change and dispersion for  
571 rna-seq data with *deseq2*. *Genome biology*, 15(12):550.
- 572 Löytynoja, A. (2014). Phylogeny-aware alignment with *prank*. In *Multiple sequence alignment methods*,  
573 pages 155–170. Springer.
- 574 Lucas, E. R. and Keller, L. (2018). Elevated expression of ageing and immunity genes in queens of the  
575 black garden ant. *Experimental gerontology*, 108:92–98.
- 576 Lucas, E. R., Privman, E., and Keller, L. (2016). Higher expression of somatic repair genes in long-lived  
577 ant queens than workers. *Aging (Albany NY)*, 8(9):1940.
- 578 Lucas, E. R., Romiguier, J., and Keller, L. (2017). Gene expression is more strongly influenced by age  
579 than caste in the ant *Lasius niger*. *Molecular ecology*, 26(19):5058–5073.
- 580 Mistry, J., Bateman, A., and Finn, R. D. (2007). Predicting active site residue annotations in the pfam  
581 database. *BMC bioinformatics*, 8(1):298.

- 582 Mitchell, A., Chang, H.-Y., Daugherty, L., Fraser, M., Hunter, S., Lopez, R., McAnulla, C., McMenamin,  
583 C., Nuka, G., Pesseat, S., et al. (2014). The interpro protein families database: the classification  
584 resource after 15 years. *Nucleic acids research*, 43(D1):D213–D221.
- 585 Negroni, M. A., Foitzik, S., and Feldmeyer, B. (2019). Long-lived temnothorax ant queens switch from  
586 investment in immunity to antioxidant production with age. *Scientific reports*, 9(1):7270.
- 587 Negroni, M. A., Jongepier, E., Feldmeyer, B., Kramer, B. H., and Foitzik, S. (2016). Life history evolution  
588 in social insects: a female perspective. *Current opinion in insect science*, 16:51–57.
- 589 Oettler, J. and Schrepf, A. (2016). Fitness and aging in cardiocondyla obscurior ant queens. *Current*  
590 *opinion in insect science*, 16:58–63.
- 591 Partridge, L., Alic, N., Bjedov, I., and Piper, M. D. (2011). Ageing in drosophila: the role of the  
592 insulin/igf and tor signalling network. *Experimental gerontology*, 46(5):376–381.
- 593 R Core Team (2018). *R: A Language and Environment for Statistical Computing*. R Foundation for  
594 Statistical Computing, Vienna, Austria.
- 595 Rivera, M. C., Jain, R., Moore, J. E., and Lake, J. A. (1998). Genomic evidence for two functionally  
596 distinct gene classes. *Proceedings of the National Academy of Sciences*, 95(11):6239–6244.
- 597 Rubinsztein, D. C., Mariño, G., and Kroemer, G. (2011). Autophagy and aging. *Cell*, 146(5):682–695.
- 598 Schrader, L., Kim, J. W., Ence, D., Zimin, A., Klein, A., Wyschetzki, K., Weichselgartner, T., Kemena,  
599 C., Stökl, J., Schultner, E., et al. (2014). Transposable element islands facilitate adaptation to novel  
600 environments in an invasive species. *Nature communications*, 5(1):1–10.
- 601 Schrepf, A., Heinze, J., and Cremer, S. (2005). Sexual cooperation: mating increases longevity in ant  
602 queens. *Current Biology*, 15(3):267–270.
- 603 Seehuus, S.-C., Taylor, S., Petersen, K., and Aamodt, R. M. (2013). Somatic maintenance resources in  
604 the honeybee worker fat body are distributed to withstand the most life-threatening challenges at each  
605 life stage. *PloS one*, 8(8):e69870.
- 606 Shannon, P., Markiel, A., Ozier, O., Baliga, N. S., Wang, J. T., Ramage, D., Amin, N., Schwikowski,  
607 B., and Ideker, T. (2003). Cytoscape: a software environment for integrated models of biomolecular  
608 interaction networks. *Genome research*, 13(11):2498–2504.
- 609 Southworth, L. K., Owen, A. B., and Kim, S. K. (2009). Aging mice show a decreasing correlation of  
610 gene expression within genetic modules. *PLoS genetics*, 5(12):e1000776.

- 611 Suyama, M., Torrents, D., and Bork, P. (2006). Pal2nal: robust conversion of protein sequence alignments  
612 into the corresponding codon alignments. *Nucleic acids research*, 34(suppl\_2):W609–W612.
- 613 Tatar, M., Bartke, A., and Antebi, A. (2003). The endocrine regulation of aging by insulin-like signals.  
614 *Science*, 299(5611):1346–1351.
- 615 Thurmond, J., Goodman, J. L., Strelets, V. B., Attrill, H., Gramates, L. S., Marygold, S. J., Matthews,  
616 B. B., Millburn, G., Antonazzo, G., Trovisco, V., et al. (2018). Flybase 2.0: the next generation.  
617 *Nucleic acids research*, 47(D1):D759–D765.
- 618 Tilstra, J. S., Robinson, A. R., Wang, J., Gregg, S. Q., Clauson, C. L., Reay, D. P., Nasto, L. A., St Croix,  
619 C. M., Usas, A., Vo, N., et al. (2012). Nf- $\kappa$ b inhibition delays dna damage-induced senescence and  
620 aging in mice. *The Journal of clinical investigation*, 122(7):2601–2612.
- 621 Tomaru, U., Takahashi, S., Ishizu, A., Miyatake, Y., Gohda, A., Suzuki, S., Ono, A., Ohara, J., Baba, T.,  
622 Murata, S., et al. (2012). Decreased proteasomal activity causes age-related phenotypes and promotes  
623 the development of metabolic abnormalities. *The American journal of pathology*, 180(3):963–972.
- 624 Turan, Z. G., Parvizi, P., Dönertaş, H. M., Tung, J., Khaitovich, P., and Somel, M. (2019). Molecular  
625 footprint of medawar’s mutation accumulation process in mammalian aging. *Aging cell*, 18(4):e12965.
- 626 Vilchez, D., Morantte, I., Liu, Z., Douglas, P. M., Merkwirth, C., Rodrigues, A. P., Manning, G., and  
627 Dillin, A. (2012). Rpn-6 determines c. elegans longevity under proteotoxic stress conditions. *Nature*,  
628 489(7415):263.
- 629 Von Wychetzkki, K., Rueppell, O., Oettler, J., and Heinze, J. (2015). Transcriptomic signatures mirror the  
630 lack of the fecundity/longevity trade-off in ant queens. *Molecular biology and evolution*, 32(12):3173–  
631 3185.
- 632 Ward, P. S., Brady, S. G., Fisher, B. L., and Schultz, T. R. (2015). The evolution of myrmicine ants:  
633 phylogeny and biogeography of a hyperdiverse ant clade (h ymenoptera: F ormicidae). *Systematic*  
634 *Entomology*, 40(1):61–81.
- 635 Williams, G. C. (1957). Pleiotropy, natural selection, and the evolution of senescence. *evolution*, pages  
636 398–411.
- 637 Yang, Z. (1997). Paml: a program package for phylogenetic analysis by maximum likelihood. *Bioinfor-*  
638 *matics*, 13(5):555–556.

## 639 **Acknowledgements**

640 This paper was written as part of the research carried out by the DFG Collaborative Research Unit (RU)  
641 ‘Sociality and the Reversal of the Fecundity-longevity Trade-off’ (DFG FOR2281, [www.so-long.org](http://www.so-long.org)),  
642 and we thank the members of the RU for stimulating discussions. MCH is supported by a DFG grant  
643 BO2544/11-1 to EBB. JO and LMJN are supported by DFG grant OE549. MR and TF were supported  
644 by the Swiss National Science Foundation (SNSF) (grants 310030E-164207 and 31003A\_182262 to TF)  
645 and the Novartis Foundation for Medical-Biological Research (grant 19B149 to TF).

## 646 **Author information**

### 647 *Affiliations*

648 Institute for Evolution and Biodiversity, University of Münster, Münster, Germany:

649 Erich Bornberg-Bauer & Mark C Harrison

650

651 Department of Protein Evolution, Max Planck Institute for Developmental Biology, Tübingen:

652 Erich Bornberg-Bauer

653

654 Institute for Zoologie/Evolutionary biology, University of Regensburg, Regensburg, Germany:

655 Luisa M. Jaimes-Nino & Jan Oettler

656

657 Department of Biology, University of Fribourg, Fribourg, Switzerland:

658 Marisa Almeida Rodrigues & Thomas Flatt

### 659 *Contributions*

660 MCH, EBB conceived and initiated the project. MCH, EBB and JO designed the study. MCH wrote the  
661 manuscript and carried out most analyses. JR assisted with dN/dS analyses. MCH and JO interpreted ant  
662 data, all authors interpreted comparative data. LMJ assisted in the interpretation of GO term enrichment  
663 analyses. TF and MAR generated fly data and helped analyse them. MCH wrote the manuscript which  
664 was revised and approved by all authors.

### 665 *Corresponding authors*

666 Correspondence to Erich Bornberg-Bauer and Jan Oettler.

<sup>667</sup> *Data Availability*

<sup>668</sup> Ant queen data are already published (Von Wychetzki *et al.*, 2015) and available at SRA under accessions:

<sup>669</sup> PRJNA293450 & PRJNA284224. *Drosophila* data are deposited on SRA under accession: PRJNA615318.

<sup>670</sup> Scripts are available on the github: <https://github.com/MCH74/AgeingInCardiocondyla>

671 **Supplementary figures**

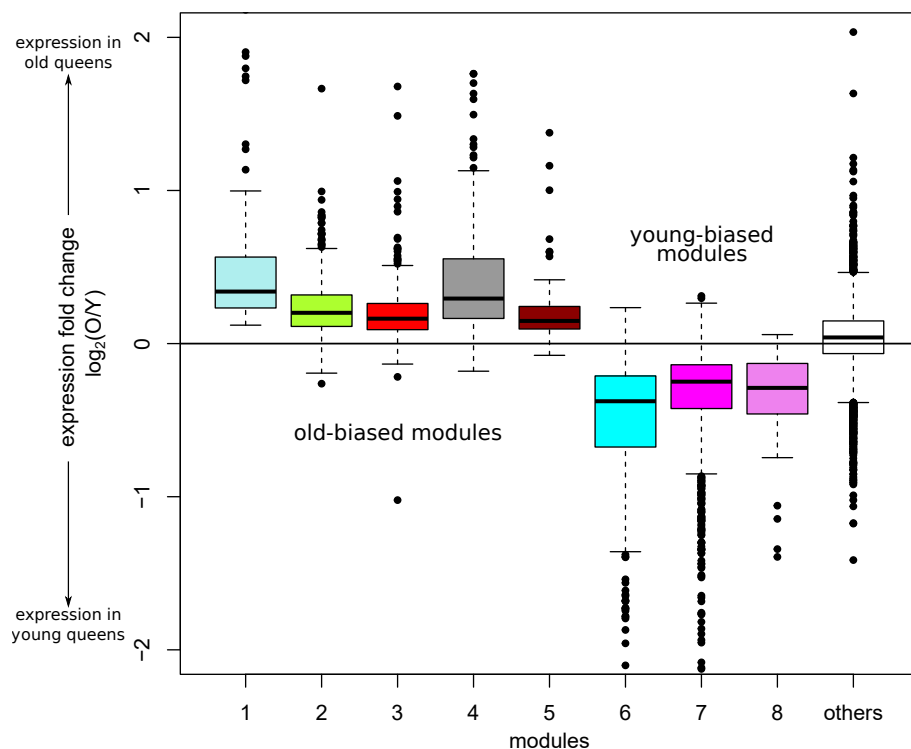

**Figure S1:** Fold change of expression in old compared to young queens in each of the significant modules ( $\log_2(\text{old}/\text{young})$ ). Correspondingly, genes within the 'old-biased' modules (1-5) show  $\log_2$ -fold-change of expression  $> 0$  (medians: 0.340, 0.201, 0.163, 0.294, 0.148, respectively) and 'young-biased' modules (6-8) contain genes with negative  $\log_2$ -fold-change of expression (medians: -0.376, -0.249, -0.289, respectively). Expression fold change for genes of all other modules (white plot, right-most), on the other hand, has a median close to zero (0.040).

672 **Supplementary Tables**

**Table S1:** GO terms (Biological Process) significantly enriched within genes with a connectivity fold change greater than 2 in old compared to young queens.

| GO.ID      | Term                                        | Annotated | Significant | Expected | pvalue  | FDR     |
|------------|---------------------------------------------|-----------|-------------|----------|---------|---------|
| GO:0006518 | peptide metabolic process                   | 168       | 67          | 20.85    | 1.1e-20 | 3.4e-18 |
| GO:0043043 | peptide biosynthetic process                | 163       | 65          | 20.23    | 4.5e-20 | 6.4e-18 |
| GO:0006412 | translation                                 | 160       | 64          | 19.85    | 7.5e-20 | 7.7e-18 |
| GO:0043604 | amide biosynthetic process                  | 166       | 65          | 20.6     | 1.4e-19 | 9.8e-18 |
| GO:0043603 | cellular amide metabolic process            | 175       | 67          | 21.71    | 1.6e-19 | 9.8e-18 |
| GO:1901566 | organonitrogen compound biosynthetic pro... | 270       | 83          | 33.5     | 3.8e-17 | 1.9e-15 |
| GO:0044267 | cellular protein metabolic process          | 574       | 128         | 71.22    | 1e-13   | 4.4e-12 |

*Continued on next page*

Table S1 – *Continued from previous page*

| GO.ID      | Term                                        | Annotated | Significant | Expected | pvalue  | FDR     |
|------------|---------------------------------------------|-----------|-------------|----------|---------|---------|
| GO:0019538 | protein metabolic process                   | 744       | 141         | 92.32    | 2.5e-09 | 9.6e-08 |
| GO:1901564 | organonitrogen compound metabolic proces... | 892       | 161         | 110.68   | 4.5e-09 | 1.5e-07 |
| GO:0034645 | cellular macromolecule biosynthetic proc... | 544       | 106         | 67.5     | 1.3e-07 | 4.0e-06 |
| GO:0009059 | macromolecule biosynthetic process          | 546       | 106         | 67.75    | 1.6e-07 | 4.3e-06 |
| GO:0044271 | cellular nitrogen compound biosynthetic ... | 553       | 107         | 68.62    | 1.7e-07 | 4.3e-06 |
| GO:0009058 | biosynthetic process                        | 700       | 128         | 86.86    | 2.2e-07 | 5.2e-06 |
| GO:0044249 | cellular biosynthetic process               | 655       | 121         | 81.28    | 3.1e-07 | 6.8e-06 |
| GO:1901576 | organic substance biosynthetic process      | 664       | 122         | 82.39    | 3.7e-07 | 7.6e-06 |
| GO:0009987 | cellular process                            | 1960      | 288         | 243.21   | 5.8e-07 | 1.1e-5  |
| GO:0044260 | cellular macromolecule metabolic process    | 1029      | 170         | 127.68   | 1.4e-06 | 2.5e-5  |
| GO:0044237 | cellular metabolic process                  | 1425      | 220         | 176.82   | 2.8e-06 | 4.8e-5  |
| GO:0010467 | gene expression                             | 598       | 107         | 74.2     | 1e-05   | 1.6e-4  |
| GO:0034641 | cellular nitrogen compound metabolic pro... | 872       | 141         | 108.2    | 7.6e-5  | 0.001   |
| GO:0006807 | nitrogen compound metabolic process         | 1494      | 216         | 185.38   | 7.0e-4  | 0.010   |
| GO:0008152 | metabolic process                           | 2076      | 286         | 257.6    | 9.6e-4  | 0.013   |
| GO:0044238 | primary metabolic process                   | 1584      | 226         | 196.55   | 0.001   | 0.014   |
| GO:0045333 | cellular respiration                        | 8         | 5           | 0.99     | 0.001   | 0.015   |
| GO:0043170 | macromolecule metabolic process             | 1370      | 198         | 170      | 0.002   | 0.020   |
| GO:0046034 | ATP metabolic process                       | 25        | 9           | 3.1      | 0.002   | 0.025   |
| GO:0071704 | organic substance metabolic process         | 1665      | 234         | 206.6    | 0.002   | 0.025   |
| GO:0015980 | energy derivation by oxidation of organi... | 9         | 5           | 1.12     | 0.002   | 0.026   |
| GO:0009144 | purine nucleoside triphosphate metabolic... | 26        | 9           | 3.23     | 0.003   | 0.028   |
| GO:0009199 | ribonucleoside triphosphate metabolic pr... | 26        | 9           | 3.23     | 0.003   | 0.028   |
| GO:0009205 | purine ribonucleoside triphosphate metab... | 26        | 9           | 3.23     | 0.003   | 0.028   |
| GO:0009123 | nucleoside monophosphate metabolic proce... | 27        | 9           | 3.35     | 0.004   | 0.033   |
| GO:0009126 | purine nucleoside monophosphate metaboli... | 27        | 9           | 3.35     | 0.004   | 0.033   |
| GO:0009141 | nucleoside triphosphate metabolic proces... | 27        | 9           | 3.35     | 0.004   | 0.033   |
| GO:0009161 | ribonucleoside monophosphate metabolic p... | 27        | 9           | 3.35     | 0.004   | 0.033   |
| GO:0009167 | purine ribonucleoside monophosphate meta... | 27        | 9           | 3.35     | 0.004   | 0.033   |
| GO:0022900 | electron transport chain                    | 7         | 4           | 0.87     | 0.006   | 0.050   |
| GO:0006091 | generation of precursor metabolites and ... | 20        | 7           | 2.48     | 0.008   | 0.063   |
| GO:0019693 | ribose phosphate metabolic process          | 44        | 11          | 5.46     | 0.016   | 0.122   |
| GO:0007049 | cell cycle                                  | 33        | 9           | 4.09     | 0.016   | 0.122   |
| GO:0009056 | catabolic process                           | 82        | 17          | 10.18    | 0.021   | 0.149   |
| GO:0006754 | ATP biosynthetic process                    | 19        | 6           | 2.36     | 0.023   | 0.149   |
| GO:0009142 | nucleoside triphosphate biosynthetic pro... | 19        | 6           | 2.36     | 0.023   | 0.149   |
| GO:0009145 | purine nucleoside triphosphate biosynthe... | 19        | 6           | 2.36     | 0.023   | 0.149   |
| GO:0009201 | ribonucleoside triphosphate biosynthetic... | 19        | 6           | 2.36     | 0.023   | 0.149   |
| GO:0009206 | purine ribonucleoside triphosphate biosy... | 19        | 6           | 2.36     | 0.023   | 0.149   |
| GO:0044257 | cellular protein catabolic process          | 35        | 9           | 4.34     | 0.023   | 0.149   |
| GO:0051603 | proteolysis involved in cellular protein... | 35        | 9           | 4.34     | 0.023   | 0.149   |
| GO:0019637 | organophosphate metabolic process           | 116       | 22          | 14.39    | 0.025   | 0.159   |
| GO:0007005 | mitochondrion organization                  | 10        | 4           | 1.24     | 0.027   | 0.163   |
| GO:0044248 | cellular catabolic process                  | 72        | 15          | 8.93     | 0.028   | 0.165   |
| GO:0006888 | ER to Golgi vesicle-mediated transport      | 6         | 3           | 0.74     | 0.028   | 0.165   |
| GO:0009150 | purine ribonucleotide metabolic process     | 42        | 10          | 5.21     | 0.029   | 0.165   |
| GO:0009259 | ribonucleotide metabolic process            | 42        | 10          | 5.21     | 0.029   | 0.165   |

*Continued on next page*

Table S1 – *Continued from previous page*

| GO.ID      | Term                                        | Annotated | Significant | Expected | pvalue | FDR   |
|------------|---------------------------------------------|-----------|-------------|----------|--------|-------|
| GO:0009124 | nucleoside monophosphate biosynthetic pr... | 21        | 6           | 2.61     | 0.037  | 0.193 |
| GO:0009127 | purine nucleoside monophosphate biosynth... | 21        | 6           | 2.61     | 0.037  | 0.193 |
| GO:0009156 | ribonucleoside monophosphate biosyntheti... | 21        | 6           | 2.61     | 0.037  | 0.193 |
| GO:0009168 | purine ribonucleoside monophosphate bios... | 21        | 6           | 2.61     | 0.037  | 0.193 |
| GO:0015985 | energy coupled proton transport, down el... | 11        | 4           | 1.36     | 0.038  | 0.193 |
| GO:0015986 | ATP synthesis coupled proton transport      | 11        | 4           | 1.36     | 0.038  | 0.193 |
| GO:0030163 | protein catabolic process                   | 38        | 9           | 4.72     | 0.039  | 0.194 |
| GO:1901137 | carbohydrate derivative biosynthetic pro... | 76        | 15          | 9.43     | 0.043  | 0.210 |
| GO:1901575 | organic substance catabolic process         | 76        | 15          | 9.43     | 0.043  | 0.210 |
| GO:0044265 | cellular macromolecule catabolic process    | 45        | 10          | 5.58     | 0.045  | 0.210 |
| GO:0006839 | mitochondrial transport                     | 7         | 3           | 0.87     | 0.045  | 0.210 |
| GO:1990542 | mitochondrial transmembrane transport       | 7         | 3           | 0.87     | 0.045  | 0.210 |
| GO:1901135 | carbohydrate derivative metabolic proces... | 144       | 25          | 17.87    | 0.048  | 0.218 |



**Table S2:** Genes with the greatest increase in connectivity in old compared to young queens.

|    | <i>C. obscurior</i> gene | Connectivity fold change (old/young) | Ortholog in <i>D. melanogaster</i>                        | E-value | PFAM domains                                                                                                                               | Function                                                      | GCN Module |
|----|--------------------------|--------------------------------------|-----------------------------------------------------------|---------|--------------------------------------------------------------------------------------------------------------------------------------------|---------------------------------------------------------------|------------|
| 1  | Cobs_00057               | 7.1                                  | FBpp0079031<br>(Suppressor of exocyst mutations 1)        | 2e-12   | PF05160.12:DSS1_SEM1<br>PF00698.20:Acyl_transf_1<br>PF00975.19:Thioesterase<br>PF14765.5:PS-DH<br>PF16197.4:KAsynt_C.assoc<br>PF08659.9:KR | member of 26S proteasome complex                              | 27         |
| 2  | Cobs_01666               | 6.5                                  | FBpp0297101<br>(Fatty acid synthase 3)                    | 0.0     | PF00109.25:ketoacyl-synt<br>PF00107.25:ADH_zinc_N<br>PF00550.24:PP-binding<br>PF02801.21:Ketoacyl-synt_C                                   | fatty acid synthesis                                          | 3          |
| 3  | Cobs_03333               | 6.3                                  | Golgi apparatus membrane protein TVP23 homolog B (Q9NYZ1) | 0.014   | /                                                                                                                                          | unknown                                                       | 16         |
| 4  | Cobs_09457               | 6.1                                  | FBpp0081645 (CG12948)                                     | 1e-21   | PF14969.5:DUF4508                                                                                                                          | unknown                                                       | 14         |
| 5  | Cobs_03249               | 5.9                                  | FBpp0083650 (Prefoldin 5)                                 | 0.001   | /                                                                                                                                          | protein folding                                               | 3          |
| 6  | Cobs_18104               | 5.7                                  | Motile sperm domain-containing protein 2 (Q8NHP6)         | 4e-66   | PF00650.19:CRAL_TRIO<br>PF00635.25:Motile_Sperm                                                                                            | ER protein, promotes interorganelle contacts                  | 15         |
| 7  | Cobs_08529               | 5.6                                  | phospholipase A1 (Q68KK0)                                 | 4e-93   | PF00151:Lipase                                                                                                                             | phospholipase                                                 | 18         |
| 8  | Cobs_06641               | 5.6                                  | FBpp0079845 (FBpp0079845)                                 | 5e-46   | PF00096.25:zf-C2H2<br>PF12874.6:zf-met<br>PF13912.5:zf-C2H2_6                                                                              | transcription factor                                          | 10         |
| 9  | Cobs_07556               | 5.5                                  | FBpp0074522 (CG14229)                                     | 8e-14   | /                                                                                                                                          | unknown                                                       | 27         |
| 10 | Cobs_07129               | 5.4                                  | FBpp0070766 (RpL35-PB)                                    | 7e-63   | PF00831:Ribosomal_L29                                                                                                                      | ribosomal protein                                             | 27         |
| 11 | Cobs_15323               | 5.4                                  | FBpp0086393<br>(Polynucleotide 5'-hydroxyl-kinase)        | 2e-31   | PF16575.4:CLP1_P                                                                                                                           | mRNA cleavage and polyadenylation factor, Clp1                | 10         |
| 12 | Cobs_12967               | 5.4                                  | FBpp0308983<br>(combgap)                                  | 1e-154  | PF00096.25:zf-C2H2                                                                                                                         | transcription factor                                          | 2          |
| 13 | Cobs_10359               | 5.4                                  | FBpp0083078 (CG31229)                                     | 4e-87   | PF02466:Tim17<br>PF00270:DEAD,                                                                                                             | Mitochondrial import inner membrane translocase subunit Tim22 | 3          |
| 14 | Cobs_09306               | 5.3                                  | FBpp0074936 (RNA helicase)                                | 0.0     | PF00271:Helicase_C                                                                                                                         | RNA helicase                                                  | 10         |
| 15 | Cobs_09326               | 5.2                                  | FBpp0079752 (RpL9)                                        | 7e-109  | PF00347:Ribosomal_L6                                                                                                                       | ribosomal protein                                             | 27         |
| 16 | Cobs_17451               | 5.2                                  | FBpp0081234 (SmD2)                                        | 3e-67   | PF01423:LSM                                                                                                                                | Small ribonucleoprotein particle protein; splicing            | 16         |
| 17 | Cobs_01606               | 5.0                                  | FBpp0290896 (CG31690)                                     | 1e-117  | PF08409:DUF1736                                                                                                                            | Protein O-mannosyl-transferase (protein modification)         | 27         |
| 18 | Cobs_14874               | 5.0                                  | FBpp0084171 (Smg6)                                        | 3e-40   | PF10373:EST1_DNA_bind,<br>PF13638:PIN_4                                                                                                    | nonsense mediated mRNA decay                                  | 10         |
| 19 | Cobs_03737               | 4.9                                  | FBpp0073777 (ND-B18)                                      | 4e-38   | PF05676:NDUF_B7                                                                                                                            | NADH dehydrogenase (ubiquinone) B18 subunit                   | 27         |
| 20 | Cobs_09935               | 4.1                                  | FBpp0082711<br>(taranis)                                  | 2e-21   | PF06031.12:SERTA                                                                                                                           | transcriptional co-regulator, chromatin remodelling           | 20         |

**Table S3:** Top hubs of discussed modules within the GCN.

|                 | <i>C. obscurior</i><br>gene | <i>D. melanogaster</i><br>ortholog                               | pfam domains                  | putative function                                                              |
|-----------------|-----------------------------|------------------------------------------------------------------|-------------------------------|--------------------------------------------------------------------------------|
| <i>module.1</i> |                             |                                                                  |                               |                                                                                |
| 1               | Cobs_16506                  | Fatty acid synthase<br>(Q71SP7)                                  | Acyl-transf.1                 | fatty-acid synthase                                                            |
| 2               | Cobs_15810                  | FBgn0013726                                                      | Septin                        | septin                                                                         |
| 3               | Cobs_13037                  | FBgn0037022                                                      | NA                            | TRAPP complex, protein transport                                               |
| 4               | Cobs_02638                  | Glutaredoxin domain-containing<br>cysteine-rich protein (Q9VNL4) | NA                            | GRXCR1, post-transcriptional<br>S-glutathionylation                            |
| 5               | Cobs_16282                  | FBgn0037238                                                      | Na_Ca_ex                      | Ca(2+):cation antiporter                                                       |
| 6               | Cobs_13547                  | FBgn0033266                                                      | SH2.SOCS_box                  | Socs44A, ubiquitination                                                        |
| 7               | Cobs_03654                  | FBgn0001104                                                      | G-alpha                       | G protein $\alpha$ i subunit                                                   |
| 8               | Cobs_00923                  | NA                                                               | NA                            |                                                                                |
| 9               | Cobs_06675                  | FBgn0052702                                                      | EGF,hEGF,<br>EGF_CA,EGF_3,CUB |                                                                                |
| 10              | Cobs_06885                  | FBgn0261556                                                      | RhoGEF                        | guanine nucleotide exchange factor                                             |
| <i>module.2</i> |                             |                                                                  |                               |                                                                                |
| 1               | Cobs_13808                  | Helicase MOV-10 (Q9HCE1)                                         | AAA_11                        | RNA helicase (mov-10-B.1)                                                      |
| 2               | Cobs_05444                  | NA                                                               | NA                            |                                                                                |
| 3               | Cobs_07118                  | FBgn0000615                                                      | NA                            | exuperantia - maternal protein,<br>polarity of the oocyte                      |
| 4               | Cobs_12340                  | FBgn0035914                                                      | DUF1295                       | oxidoreductase, uncharacterised                                                |
| 5               | Cobs_11183                  | Furin (P23188)                                                   | 4e-4                          | furin-like protease 2                                                          |
| 6               | Cobs_00943                  | NA                                                               | NA                            | activation of precursor proteins                                               |
| 7               | Cobs_05806                  | FBgn0066365                                                      | Zona_pellucida                | fasciclin-2: Neuronal recognition<br>molecule                                  |
| 8               | Cobs_04366                  | Venom dipeptidyl peptidase 4<br>(B2D0J4)                         | DPPIV_N                       | dusky-like, cuticle                                                            |
| 9               | Cobs_10253                  | FBgn0051719                                                      | PseudoU_synth.2               | RluA pseudouridine synthase 1                                                  |
| 10              | Cobs_11743                  | FBgn0040342                                                      | PPDK_N, PEP-utilizers         | putative phosphoenolpyruvate<br>synthase                                       |
| <i>module.3</i> |                             |                                                                  |                               |                                                                                |
| 1               | Cobs_10830                  | Serine/threonine/tyrosine-<br>interacting protein (Q60969)       | DSPc                          | STYX: ubiquitination & MAPK signalling                                         |
| 2               | Cobs_11033                  | FBgn0035590                                                      | Kdo                           | KEOPS/EKC: transcr. regulation                                                 |
| 3               | Cobs_08034                  | FBgn0031403                                                      | P_C10                         |                                                                                |
| 4               | Cobs_11836                  | FBgn0033663                                                      | Thioredoxin, Thioredoxin_6    | ER stress protein, disulfide-isomerase                                         |
| 5               | Cobs_16500                  | Fringe glycosyltransferase<br>(Q24342)                           | Fringe                        | fringe, Notch signalling                                                       |
| 6               | Cobs_03447                  | NA                                                               | NA                            |                                                                                |
| 7               | Cobs_02166                  | FBgn0033644                                                      | Sugar_tr                      | trehalose transporter                                                          |
| 8               | Cobs_01536                  | FBgn0030434                                                      | Sds3                          | histone deacetylase                                                            |
| 9               | Cobs_08376                  | FBgn0039233                                                      | UPF0113                       | Nip, ribosome assembly                                                         |
| 10              | Cobs_16030                  | FBgn0030871                                                      | AAA, Rep-fac_C                | part of DNA clamp                                                              |
| <i>module.4</i> |                             |                                                                  |                               |                                                                                |
| 1               | Cobs_01588                  | FBgn0082582                                                      | Tropomodulin                  | actin filaments in muscles                                                     |
| 2               | Cobs_13880                  | FBgn0010497                                                      | MFS_1                         | Dietary and metabolic<br>glutamate transporter                                 |
| 3               | Cobs_13613                  | FBgn0034647                                                      | NA                            | poor Imd response upon knock-in (pink)<br>negative regulator of<br>Imd pathway |
| 4               | Cobs_10261                  | FBgn0032235                                                      | LRR_8, LRR_1                  | Leucine-rich repeat transmembrane<br>neuronal protein 2                        |
| 5               | Cobs_09494                  | FBgn0023507                                                      | FAD_binding_4,FAD-oxidase_C   | D-2-hydroxyglutaric acid dehydrogenase<br>mitochondrion metabolism             |
| 6               | Cobs_18099                  | Krueppel-like factor luna<br>(Q8MR37)                            | NA                            | Krueppel-like factor 7<br>TF,nucleic acid binding                              |
| 7               | Cobs_18085                  | Protein G12 (Q17040)                                             | Ins_allergen_rp               | Protein G12<br>Heterotrimeric G protein<br>cytoskeleton                        |
| 8               | Cobs_16115                  | Chymotrypsin-1 (Q7SIG2)                                          | Trypsin                       | Chymotrypsin-1<br>digestive enzyme                                             |

Continued on next page

Table S3 – Continued from previous page

|                  | <i>C. obscurior</i><br>gene | <i>D. melanogaster</i><br>ortholog                            | pfam domains                                                                     | putative function                                                               |
|------------------|-----------------------------|---------------------------------------------------------------|----------------------------------------------------------------------------------|---------------------------------------------------------------------------------|
|                  | 9 Cobs_12564                | FBgn0032381                                                   | Alpha-amylase                                                                    | alpha glucosidase<br>digestive                                                  |
|                  | 10 Cobs_11149               | Odorant receptor 13a                                          | 7tm_6                                                                            | odorant receptor                                                                |
| <b>module_5</b>  |                             |                                                               |                                                                                  |                                                                                 |
|                  | 1 Cobs_14833                | FBgn0261434                                                   | THAP,zf-C2H2                                                                     | Huckebein, DNA binding                                                          |
|                  | 2 Cobs_03225                | NA                                                            | NA                                                                               |                                                                                 |
|                  | 3 Cobs_03424                | NA                                                            | NA                                                                               |                                                                                 |
|                  | 4 Cobs_05905                | FBgn0036460                                                   | WD40                                                                             | AAMP - angiogenesis                                                             |
|                  | 5 Cobs_09948                | FBgn0000320                                                   | NA                                                                               | protein-serine/threonine phosphate                                              |
|                  |                             |                                                               | ketoacyl-synt, Ketoacyl-synt_C,                                                  |                                                                                 |
|                  | 6 Cobs_10152                | Fatty acid synthase (P19096)                                  | KAsynt_C-assoc,Acyl.transf.1,<br>PS-DH,ADH_zinc_N,KR,PP-binding,<br>Thioesterase | fatty-acid synthesis                                                            |
|                  | 7 Cobs_11210                | COMM domain-containing<br>protein 8 (Q9CZG3)                  | COMM_domain                                                                      |                                                                                 |
|                  | 8 Cobs_08984                | FBgn0033507                                                   | zf-LYAR                                                                          | DNA binding                                                                     |
|                  | 9 Cobs_02509                | FBgn0039623                                                   | Pkinase                                                                          | intracellular trafficking                                                       |
|                  | 10 Cobs_10282               | FBgn0030878                                                   | zf-met,zf-C2H2.2                                                                 | TF                                                                              |
| <b>module_6</b>  |                             |                                                               |                                                                                  |                                                                                 |
|                  | 1 Cobs_05316                | Thrombospondin type-1 domain-containing<br>protein 4 (Q3UTY6) | TSP_1, ADAM_spacer1                                                              | thrombospondin type 1                                                           |
|                  | 2 Cobs_09783                | FBgn0034578                                                   | Coa1                                                                             | Cytochrome oxidase complex assembly                                             |
|                  | 3 Cobs_16775                | NA                                                            | NA                                                                               |                                                                                 |
|                  | 4 Cobs_10977                | NA                                                            | NA                                                                               |                                                                                 |
|                  | 5 Cobs_05884                | FBgn0052264                                                   | RPEL                                                                             | actin binding                                                                   |
|                  | 6 Cobs_08339                | Putative odorant receptor 71a<br>(Q9VUK5)                     | 7tm_6                                                                            | odorant receptor                                                                |
|                  | 7 Cobs_07520                | FBgn0030174                                                   | I-set, fn3                                                                       | NA                                                                              |
|                  | 8 Cobs_06555                | Protein BTG3 (P50615)                                         | BTG                                                                              | negative regulator of cell cycle                                                |
|                  | 9 Cobs_06011                | NA                                                            | NA                                                                               | NA                                                                              |
|                  | 10 Cobs_16771               | FBgn0004169                                                   | Troponin                                                                         | muscle protein                                                                  |
| <b>module_7</b>  |                             |                                                               |                                                                                  |                                                                                 |
|                  | 1 Cobs_10334                | NA                                                            | NA                                                                               |                                                                                 |
|                  | 2 Cobs_07055                | NA                                                            | NA                                                                               |                                                                                 |
|                  | 3 Cobs_09646                | FBgn0024986                                                   | Thioredoxin                                                                      | protein disulfide oxidoreductase activity                                       |
|                  | 4 Cobs_11762                | FBgn0250843                                                   | Proteasome_A_N                                                                   | Proteasome<br>STUB1,                                                            |
|                  | 5 Cobs_04738                | FBgn0027052                                                   | TPR_16, TPR_8, U-box                                                             | insulin signalling &<br>ubiquitination                                          |
|                  | 6 Cobs_17742                | FBgn0002937                                                   | RPE65                                                                            | rhodopsin/vitamin biosynthesis                                                  |
|                  | 7 Cobs_07132                | FBgn0004436                                                   | UQ_con                                                                           | Ubiquitin conjugating enzyme 6                                                  |
|                  | 8 Cobs_16235                | NA                                                            | NA                                                                               |                                                                                 |
|                  | 9 Cobs_16742                | FBgn0051005                                                   | polyprenyl_synt                                                                  | qlless, CoenzymeQ synthesis                                                     |
|                  | 10 Cobs_08806               | FBgn0036133                                                   | Tmemb_161AB                                                                      |                                                                                 |
| <b>module_8</b>  |                             |                                                               |                                                                                  |                                                                                 |
|                  | 1 Cobs_08138                | FBgn0035132                                                   | 7tm_2                                                                            | methuselah (mth)<br>modulation of life span &<br>stress response                |
|                  | 2 Cobs_06914                | FBgn0015808                                                   | Thiolase_N, Thiolase_C, SCP2                                                     | phospholipid transporter activity                                               |
|                  | 3 Cobs_07075                | FBgn0058470                                                   | Peptidase_M1, ERAP1_C                                                            |                                                                                 |
|                  | 4 Cobs_08585                | NA                                                            | NA                                                                               |                                                                                 |
|                  | 5 Cobs_04843                | FBgn0037637                                                   | NifU_N                                                                           | Iron-sulfur cluster assembly enzyme                                             |
|                  | 6 Cobs_00768                | High-affinity choline<br>transporter 1 (Q9VE46)               | SSF                                                                              |                                                                                 |
|                  | 7 Cobs_15292                | NA                                                            | NA                                                                               |                                                                                 |
|                  | 8 Cobs_07928                | FBgn0052626                                                   | A.deaminase                                                                      | AMP deaminase                                                                   |
|                  | 9 Cobs_03203                | FBgn0243512                                                   | DSPc                                                                             | serine/threonine protein phosphatase<br>regulates Jun-N-terminal kinase pathway |
|                  | 10 Cobs_07588               | AMMECR1-like protein<br>(Q8JZZ6)                              | AMMECR1                                                                          |                                                                                 |
| <b>module_27</b> |                             |                                                               |                                                                                  |                                                                                 |

Continued on next page

Table S3 – Continued from previous page

|    | <i>C. obscurior</i><br>gene | <i>D. melanogaster</i><br>ortholog                   | pfam domains             | putative function                                                                   |
|----|-----------------------------|------------------------------------------------------|--------------------------|-------------------------------------------------------------------------------------|
| 1  | Cobs_17974                  | FBgn0035998                                          | SAC3.GANP                | SAC3 domain-containing protein 1<br>centrosome duplication &<br>mitotic progression |
| 2  | Cobs_16539                  | NA                                                   | NA                       | NA                                                                                  |
| 3  | Cobs_08044                  | FBgn0000618                                          | ENY2                     | enhancer of yellow 2<br>nuclear export of mRNA<br>transcription activation          |
| 4  | Cobs_06960                  | FBgn0036545                                          | Glutaredoxin, PLA2G12    | GXIVsPLA2<br>activation of IMD pathway                                              |
| 5  | Cobs_17771                  | 18S rRNA aminocarboxypropyl-<br>transferase (Q5HZH2) | RLI, Ribo_biogen_C       | Ribosome biogenesis protein<br>TSR3 homolog                                         |
| 6  | Cobs_04280                  | FBgn0051251                                          | CS, Nudc_N               | dynein stability                                                                    |
| 7  | Cobs_17249                  | FBgn0024983                                          | ERGIC_N, COPIIcoated_ERV | transport between ER & Golgi                                                        |
| 8  | Cobs_15425                  | FBgn0261597                                          | Ribosomal_S26e           | Ribosomal protein S26                                                               |
| 9  | Cobs_09453                  | NA                                                   | NA                       | BAl1-associated protein<br>endosome to Golgi transport                              |
| 10 | Cobs_08415                  | NA                                                   | SEFIR                    | possible TOLL/IL1R-like signalling                                                  |

674

Table S4: GO terms (Biological Process) significantly enriched within selected modules of the GCN.

| GO.ID           | Term                                        | Annotated | Significant | Expected | pvalue | FDR   |
|-----------------|---------------------------------------------|-----------|-------------|----------|--------|-------|
| <i>module.1</i> |                                             |           |             |          |        |       |
| GO:0006357      | regulation of transcription by RNA polym... | 22        | 3           | 0.2      | 0.001  | 0.075 |
| GO:0016192      | vesicle-mediated transport                  | 68        | 4           | 0.62     | 0.003  | 0.115 |
| GO:0006366      | transcription by RNA polymerase II          | 37        | 3           | 0.34     | 0.004  | 0.115 |
| GO:0006886      | intracellular protein transport 70          | 3         | 0.64        | 0.025    | 0.231  |       |
| GO:0034613      | cellular protein localization               | 77        | 3           | 0.7      | 0.032  | 0.231 |
| GO:0070727      | cellular macromolecule localization         | 77        | 3           | 0.7      | 0.032  | 0.231 |
| GO:0015031      | protein transport                           | 82        | 3           | 0.75     | 0.038  | 0.231 |
| GO:0015833      | peptide transport                           | 82        | 3           | 0.75     | 0.038  | 0.231 |
| GO:0046907      | intracellular transport                     | 82        | 3           | 0.75     | 0.038  | 0.231 |
| GO:0051649      | establishment of localization in cell       | 82        | 3           | 0.75     | 0.038  | 0.231 |
| GO:0042886      | amide transport                             | 83        | 3           | 0.76     | 0.039  | 0.231 |
| GO:0045184      | establishment of protein localization       | 83        | 3           | 0.76     | 0.039  | 0.231 |
| GO:0008104      | protein localization                        | 89        | 3           | 0.81     | 0.046  | 0.231 |
| <i>module.2</i> |                                             |           |             |          |        |       |
| GO:0006464      | cellular protein modification process       | 373       | 24          | 14.44    | 0.008  | 0.277 |
| GO:0036211      | protein modification process                | 373       | 24          | 14.44    | 0.008  | 0.277 |
| GO:0007018      | microtubule-based movement                  | 46        | 6           | 1.78     | 0.008  | 0.277 |
| GO:0043412      | macromolecule modification                  | 397       | 25          | 15.37    | 0.008  | 0.277 |
| GO:0006928      | movement of cell or subcellular componen... | 48        | 6           | 1.86     | 0.010  | 0.277 |
| GO:0016579      | protein deubiquitination                    | 28        | 4           | 1.08     | 0.021  | 0.361 |
| GO:0070646      | protein modification by small protein re... | 28        | 4           | 1.08     | 0.021  | 0.361 |
| GO:0070647      | protein modification by small protein co... | 43        | 5           | 1.66     | 0.024  | 0.361 |
| GO:0007017      | microtubule-based process                   | 61        | 6           | 2.36     | 0.029  | 0.361 |
| GO:0044260      | cellular macromolecule metabolic process    | 1029      | 49          | 39.84    | 0.047  | 0.361 |
| GO:0006355      | regulation of transcription, DNA-templat... | 245       | 15          | 9.49     | 0.049  | 0.361 |
| GO:0051252      | regulation of RNA metabolic process         | 245       | 15          | 9.49     | 0.049  | 0.361 |
| GO:1903506      | regulation of nucleic acid-templated tra... | 245       | 15          | 9.49     | 0.049  | 0.361 |
| GO:2001141      | regulation of RNA biosynthetic process      | 245       | 15          | 9.49     | 0.049  | 0.361 |
| <i>module.3</i> |                                             |           |             |          |        |       |
| GO:0016051      | carbohydrate biosynthetic process           | 9         | 3           | 0.33     | 0.003  | 0.276 |
| GO:0033365      | protein localization to organelle           | 20        | 4           | 0.73     | 0.005  | 0.276 |
| GO:0065008      | regulation of biological quality            | 60        | 7           | 2.2      | 0.006  | 0.276 |
| GO:0051641      | cellular localization                       | 101       | 9           | 3.7      | 0.011  | 0.388 |
| GO:0034613      | cellular protein localization               | 77        | 7           | 2.82     | 0.021  | 0.464 |
| GO:0070727      | cellular macromolecule localization         | 77        | 7           | 2.82     | 0.021  | 0.464 |
| GO:0045454      | cell redox homeostasis                      | 30        | 4           | 1.1      | 0.022  | 0.464 |
| GO:0008610      | lipid biosynthetic process                  | 32        | 4           | 1.17     | 0.028  | 0.464 |

Continued on next page

Table S4 – Continued from previous page

| GO.ID           | Term                                        | Annotated | Significant | Expected | pvalue  | FDR     |
|-----------------|---------------------------------------------|-----------|-------------|----------|---------|---------|
| GO:0019725      | cellular homeostasis                        | 35        | 4           | 1.28     | 0.037   | 0.464   |
| GO:0008104      | protein localization                        | 89        | 7           | 3.26     | 0.043   | 0.464   |
| GO:0006357      | regulation of transcription by RNA polym... | 22        | 3           | 0.8      | 0.044   | 0.464   |
| GO:0006950      | response to stress                          | 73        | 6           | 2.67     | 0.049   | 0.464   |
| GO:0046903      | secretion                                   | 23        | 3           | 0.84     | 0.050   | 0.464   |
| <i>module.4</i> |                                             |           |             |          |         |         |
| GO:0055085      | transmembrane transport                     | 283       | 13          | 5        | 0.001   | 0.066   |
| GO:0006508      | proteolysis                                 | 233       | 10          | 4.12     | 0.007   | 0.172   |
| GO:0006810      | transport                                   | 544       | 17          | 9.62     | 0.011   | 0.172   |
| GO:0051234      | establishment of localization               | 545       | 17          | 9.64     | 0.011   | 0.172   |
| GO:0051179      | localization                                | 556       | 17          | 9.83     | 0.013   | 0.172   |
| GO:0006812      | cation transport                            | 92        | 5           | 1.63     | 0.022   | 0.243   |
| GO:0048519      | negative regulation of biological proces... | 38        | 3           | 0.67     | 0.029   | 0.259   |
| GO:0006030      | chitin metabolic process                    | 43        | 3           | 0.76     | 0.039   | 0.259   |
| GO:0006040      | amino sugar metabolic process               | 43        | 3           | 0.76     | 0.039   | 0.259   |
| GO:1901071      | glucosamine-containing compound metaboli... | 43        | 3           | 0.76     | 0.039   | 0.259   |
| <i>module.5</i> |                                             |           |             |          |         |         |
| GO:0071705      | nitrogen compound transport                 | 100       | 5           | 1.25     | 0.008   | 0.205   |
| GO:0019222      | regulation of metabolic process             | 270       | 8           | 3.38     | 0.017   | 0.205   |
| GO:0015031      | protein transport                           | 82        | 4           | 1.03     | 0.018   | 0.205   |
| GO:0015833      | peptide transport                           | 82        | 4           | 1.03     | 0.018   | 0.205   |
| GO:0034660      | ncRNA metabolic process                     | 82        | 4           | 1.03     | 0.018   | 0.205   |
| GO:0042886      | amide transport                             | 83        | 4           | 1.04     | 0.019   | 0.205   |
| GO:0045184      | establishment of protein localization       | 83        | 4           | 1.04     | 0.019   | 0.205   |
| GO:0071702      | organic substance transport                 | 126       | 5           | 1.58     | 0.019   | 0.205   |
| GO:0008104      | protein localization                        | 89        | 4           | 1.11     | 0.024   | 0.210   |
| GO:0044085      | cellular component biogenesis               | 92        | 4           | 1.15     | 0.027   | 0.210   |
| GO:0071840      | cellular component organization or bioge... | 190       | 6           | 2.38     | 0.029   | 0.210   |
| GO:0065003      | protein-containing complex assembly         | 56        | 3           | 0.7      | 0.032   | 0.210   |
| GO:0043933      | protein-containing complex subunit organ... | 61        | 3           | 0.76     | 0.040   | 0.210   |
| GO:0031323      | regulation of cellular metabolic process    | 261       | 7           | 3.26     | 0.040   | 0.210   |
| GO:0051171      | regulation of nitrogen compound metaboli... | 261       | 7           | 3.26     | 0.040   | 0.210   |
| GO:0080090      | regulation of primary metabolic process     | 261       | 7           | 3.26     | 0.040   | 0.210   |
| GO:0022607      | cellular component assembly                 | 64        | 3           | 0.8      | 0.045   | 0.210   |
| GO:0060255      | regulation of macromolecule metabolic pr... | 269       | 7           | 3.36     | 0.046   | 0.210   |
| GO:0006399      | tRNA metabolic process                      | 65        | 3           | 0.81     | 0.046   | 0.210   |
| GO:0016043      | cellular component organization             | 162       | 5           | 2.02     | 0.049   | 0.211   |
| <i>module.6</i> |                                             |           |             |          |         |         |
| GO:0055085      | transmembrane transport                     | 283       | 40          | 22.09    | 9.7e-05 | 0.015   |
| GO:0006813      | potassium ion transport                     | 10        | 5           | 0.78     | 5.1e-4  | 0.039   |
| GO:0006810      | transport                                   | 544       | 57          | 42.46    | 0.009   | 0.202   |
| GO:0051234      | establishment of localization               | 545       | 57          | 42.54    | 0.009   | 0.202   |
| GO:0007154      | cell communication                          | 334       | 38          | 26.07    | 0.009   | 0.202   |
| GO:0023052      | signaling                                   | 334       | 38          | 26.07    | 0.009   | 0.202   |
| GO:0009165      | nucleotide biosynthetic process             | 58        | 10          | 4.53     | 0.013   | 0.202   |
| GO:1901293      | nucleoside phosphate biosynthetic proces... | 58        | 10          | 4.53     | 0.013   | 0.202   |
| GO:0051179      | localization                                | 556       | 57          | 43.4     | 0.013   | 0.202   |
| GO:0006811      | ion transport                               | 194       | 24          | 15.14    | 0.014   | 0.202   |
| GO:0051259      | protein complex oligomerization             | 13        | 4           | 1.01     | 0.015   | 0.202   |
| GO:0007186      | G protein-coupled receptor signaling pat... | 126       | 17          | 9.83     | 0.017   | 0.209   |
| GO:0007165      | signal transduction                         | 327       | 36          | 25.52    | 0.018   | 0.209   |
| GO:0006814      | sodium ion transport                        | 14        | 4           | 1.09     | 0.019   | 0.209   |
| GO:0009108      | coenzyme biosynthetic process               | 22        | 5           | 1.72     | 0.024   | 0.245   |
| GO:0030001      | metal ion transport                         | 47        | 8           | 3.67     | 0.027   | 0.245   |
| GO:0009187      | cyclic nucleotide metabolic process         | 23        | 5           | 1.8      | 0.029   | 0.245   |
| GO:0009190      | cyclic nucleotide biosynthetic process      | 23        | 5           | 1.8      | 0.029   | 0.245   |
| GO:0009117      | nucleotide metabolic process                | 71        | 10          | 5.54     | 0.047   | 0.354   |
| GO:0051260      | protein homooligomerization                 | 11        | 3           | 0.86     | 0.048   | 0.354   |
| <i>module.7</i> |                                             |           |             |          |         |         |
| GO:0055114      | oxidation-reduction process                 | 268       | 84          | 37.67    | 1.9e-14 | 6.3e-12 |
| GO:0044281      | small molecule metabolic process            | 178       | 51          | 25.02    | 1.4e-07 | 2.3e-05 |
| GO:0005975      | carbohydrate metabolic process              | 96        | 32          | 13.49    | 9.2e-07 | 1.0e-4  |
| GO:0008152      | metabolic process                           | 2076      | 327         | 291.78   | 1.2e-4  | 0.010   |
| GO:0019693      | ribose phosphate metabolic process          | 44        | 16          | 6.18     | 1.7e-4  | 0.010   |

Continued on next page

Table S4 – Continued from previous page

| GO.ID      | Term                                        | Annotated | Significant | Expected | pvalue | FDR   |
|------------|---------------------------------------------|-----------|-------------|----------|--------|-------|
| GO:0019637 | organophosphate metabolic process           | 116       | 31          | 16.3     | 1.9e-4 | 0.010 |
| GO:0006163 | purine nucleotide metabolic process         | 46        | 16          | 6.47     | 3.0e-4 | 0.012 |
| GO:0009150 | purine ribonucleotide metabolic process     | 42        | 15          | 5.9      | 3.4e-4 | 0.012 |
| GO:0009259 | ribonucleotide metabolic process            | 42        | 15          | 5.9      | 3.4e-4 | 0.012 |
| GO:0072521 | purine-containing compound metabolic pro... | 47        | 16          | 6.61     | 4.0e-4 | 0.013 |
| GO:0055086 | nucleobase-containing small molecule met... | 82        | 23          | 11.53    | 6.1e-4 | 0.018 |
| GO:0019752 | carboxylic acid metabolic process           | 79        | 22          | 11.1     | 8.8e-4 | 0.019 |
| GO:0006164 | purine nucleotide biosynthetic process      | 37        | 13          | 5.2      | 0.001  | 0.019 |
| GO:0006629 | lipid metabolic process                     | 95        | 25          | 13.35    | 0.001  | 0.019 |
| GO:0006082 | organic acid metabolic process              | 80        | 22          | 11.24    | 0.001  | 0.019 |
| GO:0043436 | oxoacid metabolic process                   | 80        | 22          | 11.24    | 0.001  | 0.019 |
| GO:0009152 | purine ribonucleotide biosynthetic proce... | 33        | 12          | 4.64     | 0.001  | 0.019 |
| GO:0009260 | ribonucleotide biosynthetic process         | 33        | 12          | 4.64     | 0.001  | 0.019 |
| GO:0046390 | ribose phosphate biosynthetic process       | 33        | 12          | 4.64     | 0.001  | 0.019 |
| GO:0051186 | cofactor metabolic process                  | 42        | 14          | 5.9      | 0.001  | 0.019 |
| GO:0072522 | purine-containing compound biosynthetic ... | 38        | 13          | 5.34     | 0.001  | 0.021 |
| GO:0044282 | small molecule catabolic process            | 8         | 5           | 1.12     | 0.002  | 0.031 |
| GO:0006732 | coenzyme metabolic process                  | 27        | 10          | 3.79     | 0.002  | 0.034 |
| GO:0019439 | aromatic compound catabolic process         | 23        | 9           | 3.23     | 0.003  | 0.034 |
| GO:1901361 | organic cyclic compound catabolic proces... | 23        | 9           | 3.23     | 0.003  | 0.034 |
| GO:0009117 | nucleotide metabolic process                | 71        | 19          | 9.98     | 0.003  | 0.041 |
| GO:0055085 | transmembrane transport                     | 283       | 56          | 39.78    | 0.003  | 0.041 |
| GO:0032787 | monocarboxylic acid metabolic process       | 16        | 7           | 2.25     | 0.004  | 0.044 |
| GO:0006753 | nucleoside phosphate metabolic process      | 72        | 19          | 10.12    | 0.004  | 0.044 |
| GO:0016052 | carbohydrate catabolic process              | 9         | 5           | 1.26     | 0.004  | 0.046 |
| GO:0046034 | ATP metabolic process                       | 25        | 9           | 3.51     | 0.005  | 0.053 |
| GO:0044255 | cellular lipid metabolic process            | 54        | 15          | 7.59     | 0.006  | 0.054 |
| GO:0044283 | small molecule biosynthetic process         | 30        | 10          | 4.22     | 0.006  | 0.054 |
| GO:0009144 | purine nucleoside triphosphate metabolic... | 26        | 9           | 3.65     | 0.007  | 0.054 |
| GO:0009199 | ribonucleoside triphosphate metabolic pr... | 26        | 9           | 3.65     | 0.007  | 0.054 |
| GO:0009205 | purine ribonucleoside triphosphate metab... | 26        | 9           | 3.65     | 0.007  | 0.054 |
| GO:0009166 | nucleotide catabolic process                | 10        | 5           | 1.41     | 0.007  | 0.054 |
| GO:0009108 | coenzyme biosynthetic process               | 22        | 8           | 3.09     | 0.008  | 0.054 |
| GO:0044270 | cellular nitrogen compound catabolic pro... | 22        | 8           | 3.09     | 0.008  | 0.054 |
| GO:0046700 | heterocycle catabolic process               | 22        | 8           | 3.09     | 0.008  | 0.054 |
| GO:0009056 | catabolic process                           | 82        | 20          | 11.53    | 0.008  | 0.054 |
| GO:0006733 | oxidoreduction coenzyme metabolic proces... | 14        | 6           | 1.97     | 0.008  | 0.054 |
| GO:0044248 | cellular catabolic process                  | 72        | 18          | 10.12    | 0.009  | 0.054 |
| GO:0009123 | nucleoside monophosphate metabolic proce... | 27        | 9           | 3.79     | 0.009  | 0.054 |
| GO:0009126 | purine nucleoside monophosphate metaboli... | 27        | 9           | 3.79     | 0.009  | 0.054 |
| GO:0009141 | nucleoside triphosphate metabolic proces... | 27        | 9           | 3.79     | 0.009  | 0.054 |
| GO:0009161 | ribonucleoside monophosphate metabolic p... | 27        | 9           | 3.79     | 0.009  | 0.054 |
| GO:0009167 | purine ribonucleoside monophosphate meta... | 27        | 9           | 3.79     | 0.009  | 0.054 |
| GO:0015908 | fatty acid transport                        | 7         | 4           | 0.98     | 0.009  | 0.054 |
| GO:0015909 | long-chain fatty acid transport             | 7         | 4           | 0.98     | 0.009  | 0.054 |
| GO:0016054 | organic acid catabolic process              | 7         | 4           | 0.98     | 0.009  | 0.054 |
| GO:0032309 | icosanoid secretion                         | 7         | 4           | 0.98     | 0.009  | 0.054 |
| GO:0046395 | carboxylic acid catabolic process           | 7         | 4           | 0.98     | 0.009  | 0.054 |
| GO:0046717 | acid secretion                              | 7         | 4           | 0.98     | 0.009  | 0.054 |
| GO:0050482 | arachidonic acid secretion                  | 7         | 4           | 0.98     | 0.009  | 0.054 |
| GO:0071715 | icosanoid transport                         | 7         | 4           | 0.98     | 0.009  | 0.054 |
| GO:1901571 | fatty acid derivative transport             | 7         | 4           | 0.98     | 0.009  | 0.054 |
| GO:1903963 | arachidonate transport                      | 7         | 4           | 0.98     | 0.009  | 0.054 |
| GO:0006820 | anion transport                             | 32        | 10          | 4.5      | 0.010  | 0.054 |
| GO:0006754 | ATP biosynthetic process                    | 19        | 7           | 2.67     | 0.011  | 0.056 |
| GO:0009142 | nucleoside triphosphate biosynthetic pro... | 19        | 7           | 2.67     | 0.011  | 0.056 |
| GO:0009145 | purine nucleoside triphosphate biosynthe... | 19        | 7           | 2.67     | 0.011  | 0.056 |
| GO:0009201 | ribonucleoside triphosphate biosynthetic... | 19        | 7           | 2.67     | 0.011  | 0.056 |
| GO:0009206 | purine ribonucleoside triphosphate biosy... | 19        | 7           | 2.67     | 0.011  | 0.056 |
| GO:0005996 | monosaccharide metabolic process            | 11        | 5           | 1.55     | 0.012  | 0.056 |
| GO:0015718 | monocarboxylic acid transport               | 11        | 5           | 1.55     | 0.012  | 0.056 |
| GO:0015849 | organic acid transport                      | 11        | 5           | 1.55     | 0.012  | 0.056 |
| GO:0019318 | hexose metabolic process                    | 11        | 5           | 1.55     | 0.012  | 0.056 |
| GO:0046942 | carboxylic acid transport                   | 11        | 5           | 1.55     | 0.012  | 0.056 |

Continued on next page

Table S4 – Continued from previous page

| GO.ID           | Term                                        | Annotated | Significant | Expected | pvalue | FDR   |
|-----------------|---------------------------------------------|-----------|-------------|----------|--------|-------|
| GO:1901292      | nucleoside phosphate catabolic process      | 11        | 5           | 1.55     | 0.012  | 0.056 |
| GO:1901605      | alpha-amino acid metabolic process          | 11        | 5           | 1.55     | 0.012  | 0.056 |
| GO:1901575      | organic substance catabolic process         | 76        | 18          | 10.68    | 0.016  | 0.064 |
| GO:0006090      | pyruvate metabolic process                  | 8         | 4           | 1.12     | 0.017  | 0.064 |
| GO:0006096      | glycolytic process                          | 8         | 4           | 1.12     | 0.017  | 0.064 |
| GO:0006165      | nucleoside diphosphate phosphorylation      | 8         | 4           | 1.12     | 0.017  | 0.064 |
| GO:0006757      | ATP generation from ADP                     | 8         | 4           | 1.12     | 0.017  | 0.064 |
| GO:0009132      | nucleoside diphosphate metabolic process    | 8         | 4           | 1.12     | 0.017  | 0.064 |
| GO:0009135      | purine nucleoside diphosphate metabolic ... | 8         | 4           | 1.12     | 0.017  | 0.064 |
| GO:0009179      | purine ribonucleoside diphosphate metabo... | 8         | 4           | 1.12     | 0.017  | 0.064 |
| GO:0009185      | ribonucleoside diphosphate metabolic pro... | 8         | 4           | 1.12     | 0.017  | 0.064 |
| GO:0030258      | lipid modification                          | 8         | 4           | 1.12     | 0.017  | 0.064 |
| GO:0042866      | pyruvate biosynthetic process               | 8         | 4           | 1.12     | 0.017  | 0.064 |
| GO:0046031      | ADP metabolic process                       | 8         | 4           | 1.12     | 0.017  | 0.064 |
| GO:0046939      | nucleotide phosphorylation                  | 8         | 4           | 1.12     | 0.017  | 0.064 |
| GO:0016053      | organic acid biosynthetic process           | 16        | 6           | 2.25     | 0.017  | 0.064 |
| GO:0046394      | carboxylic acid biosynthetic process        | 16        | 6           | 2.25     | 0.017  | 0.064 |
| GO:1902600      | proton transmembrane transport              | 25        | 8           | 3.51     | 0.017  | 0.064 |
| GO:0019362      | pyridine nucleotide metabolic process       | 12        | 5           | 1.69     | 0.018  | 0.064 |
| GO:0034404      | nucleobase-containing small molecule bio... | 12        | 5           | 1.69     | 0.018  | 0.064 |
| GO:0046434      | organophosphate catabolic process           | 12        | 5           | 1.69     | 0.018  | 0.064 |
| GO:0046496      | nicotinamide nucleotide metabolic proces... | 12        | 5           | 1.69     | 0.018  | 0.064 |
| GO:0072330      | monocarboxylic acid biosynthetic process    | 12        | 5           | 1.69     | 0.018  | 0.064 |
| GO:0072524      | pyridine-containing compound metabolic p... | 12        | 5           | 1.69     | 0.018  | 0.064 |
| GO:0051188      | cofactor biosynthetic process               | 30        | 9           | 4.22     | 0.018  | 0.064 |
| GO:0009124      | nucleoside monophosphate biosynthetic pr... | 21        | 7           | 2.95     | 0.020  | 0.068 |
| GO:0009127      | purine nucleoside monophosphate biosynth... | 21        | 7           | 2.95     | 0.020  | 0.068 |
| GO:0009156      | ribonucleoside monophosphate biosyntheti... | 21        | 7           | 2.95     | 0.020  | 0.068 |
| GO:0009168      | purine ribonucleoside monophosphate bios... | 21        | 7           | 2.95     | 0.020  | 0.068 |
| GO:0009063      | cellular amino acid catabolic process       | 5         | 3           | 0.7      | 0.022  | 0.072 |
| GO:0046834      | lipid phosphorylation                       | 5         | 3           | 0.7      | 0.022  | 0.072 |
| GO:0046854      | phosphatidylinositol phosphorylation        | 5         | 3           | 0.7      | 0.022  | 0.072 |
| GO:0015672      | monovalent inorganic cation transport       | 47        | 12          | 6.61     | 0.026  | 0.083 |
| GO:0015698      | inorganic anion transport                   | 13        | 5           | 1.83     | 0.026  | 0.083 |
| GO:0009165      | nucleotide biosynthetic process             | 58        | 14          | 8.15     | 0.027  | 0.083 |
| GO:1901293      | nucleoside phosphate biosynthetic proces... | 58        | 14          | 8.15     | 0.027  | 0.083 |
| GO:0008272      | sulfate transport                           | 9         | 4           | 1.26     | 0.027  | 0.084 |
| GO:0072348      | sulfur compound transport                   | 9         | 4           | 1.26     | 0.027  | 0.084 |
| GO:0006644      | phospholipid metabolic process              | 37        | 10          | 5.2      | 0.027  | 0.084 |
| GO:0006811      | ion transport                               | 194       | 37          | 27.27    | 0.028  | 0.085 |
| GO:0006182      | cGMP biosynthetic process                   | 6         | 3           | 0.84     | 0.040  | 0.103 |
| GO:0006631      | fatty acid metabolic process                | 6         | 3           | 0.84     | 0.040  | 0.103 |
| GO:0016485      | protein processing                          | 6         | 3           | 0.84     | 0.040  | 0.103 |
| GO:0033865      | nucleoside bisphosphate metabolic proces... | 6         | 3           | 0.84     | 0.040  | 0.103 |
| GO:0033875      | ribonucleoside bisphosphate metabolic pr... | 6         | 3           | 0.84     | 0.040  | 0.103 |
| GO:0034032      | purine nucleoside bisphosphate metabolic... | 6         | 3           | 0.84     | 0.040  | 0.103 |
| GO:0046068      | cGMP metabolic process                      | 6         | 3           | 0.84     | 0.040  | 0.103 |
| GO:0009116      | nucleoside metabolic process                | 10        | 4           | 1.41     | 0.040  | 0.103 |
| GO:0015988      | energy coupled proton transmembrane tran... | 10        | 4           | 1.41     | 0.040  | 0.103 |
| GO:0015991      | ATP hydrolysis coupled proton transport     | 10        | 4           | 1.41     | 0.040  | 0.103 |
| GO:0019359      | nicotinamide nucleotide biosynthetic pro... | 10        | 4           | 1.41     | 0.040  | 0.103 |
| GO:0019363      | pyridine nucleotide biosynthetic process    | 10        | 4           | 1.41     | 0.040  | 0.103 |
| GO:0033013      | tetrapyrrole metabolic process              | 10        | 4           | 1.41     | 0.040  | 0.103 |
| GO:0044262      | cellular carbohydrate metabolic process     | 10        | 4           | 1.41     | 0.040  | 0.103 |
| GO:0072525      | pyridine-containing compound biosyntheti... | 10        | 4           | 1.41     | 0.040  | 0.103 |
| GO:0090662      | ATP hydrolysis coupled transmembrane tra... | 10        | 4           | 1.41     | 0.040  | 0.103 |
| GO:0099131      | ATP hydrolysis coupled ion transmembrane... | 10        | 4           | 1.41     | 0.040  | 0.103 |
| GO:0099132      | ATP hydrolysis coupled cation transmembr... | 10        | 4           | 1.41     | 0.040  | 0.103 |
| GO:1901657      | glycosyl compound metabolic process         | 10        | 4           | 1.41     | 0.040  | 0.103 |
| GO:0090407      | organophosphate biosynthetic process        | 84        | 18          | 11.81    | 0.040  | 0.103 |
| GO:1901135      | carbohydrate derivative metabolic proces... | 144       | 28          | 20.24    | 0.042  | 0.106 |
| <i>module_8</i> |                                             |           |             |          |        |       |
| GO:0007186      | G protein-coupled receptor signaling pat... | 126       | 6           | 1.19     | 0.001  | 0.038 |
| GO:0007165      | signal transduction                         | 327       | 8           | 3.09     | 0.009  | 0.103 |

Continued on next page

Table S4 – Continued from previous page

| GO.ID            | Term                                        | Annotated | Significant | Expected | pvalue  | FDR     |
|------------------|---------------------------------------------|-----------|-------------|----------|---------|---------|
| GO:0007154       | cell communication                          | 334       | 8           | 3.16     | 0.010   | 0.103   |
| GO:0023052       | signaling                                   | 334       | 8           | 3.16     | 0.010   | 0.103   |
| GO:0051716       | cellular response to stimulus               | 384       | 8           | 3.63     | 0.023   | 0.182   |
| GO:0050896       | response to stimulus                        | 409       | 8           | 3.87     | 0.032   | 0.214   |
| GO:0065007       | biological regulation                       | 683       | 11          | 6.46     | 0.042   | 0.240   |
| <i>module_27</i> |                                             |           |             |          |         |         |
| GO:0043603       | cellular amide metabolic process            | 175       | 67          | 13.29    | <1e-30  | 4.0e-29 |
| GO:0043604       | amide biosynthetic process                  | 166       | 65          | 12.6     | < 1e-30 | 4.0e-29 |
| GO:1901566       | organonitrogen compound biosynthetic pro... | 270       | 82          | 20.5     | < 1e-30 | 4.0e-29 |
| GO:0006518       | peptide metabolic process                   | 168       | 65          | 12.75    | < 1e-30 | 4.0e-29 |
| GO:0043043       | peptide biosynthetic process                | 163       | 64          | 12.37    | < 1e-30 | 4.0e-29 |
| GO:0006412       | translation                                 | 160       | 62          | 12.15    | < 1e-30 | 4.0e-29 |
| GO:0044271       | cellular nitrogen compound biosynthetic ... | 553       | 96          | 41.98    | 9.2e-18 | 1.9e-15 |
| GO:0044249       | cellular biosynthetic process               | 655       | 106         | 49.72    | 1.6e-17 | 1.9e-15 |
| GO:1901576       | organic substance biosynthetic process      | 664       | 106         | 50.41    | 4.7e-17 | 3.7e-15 |
| GO:0009058       | biosynthetic process                        | 700       | 108         | 53.14    | 2.8e-16 | 1.6e-14 |
| GO:0034645       | cellular macromolecule biosynthetic proc... | 544       | 91          | 41.3     | 1.4e-15 | 6.6e-14 |
| GO:0009059       | macromolecule biosynthetic process          | 546       | 91          | 41.45    | 1.8e-15 | 7.0e-14 |
| GO:0044267       | cellular protein metabolic process          | 574       | 88          | 43.57    | 1.3e-12 | 4.3e-11 |
| GO:1901564       | organonitrogen compound metabolic proces... | 892       | 117         | 67.72    | 2.8e-12 | 8.2e-11 |
| GO:0010467       | gene expression                             | 598       | 89          | 45.4     | 5.4e-12 | 1.4e-10 |
| GO:0034641       | cellular nitrogen compound metabolic pro... | 872       | 110         | 66.2     | 3.4e-10 | 8.0e-09 |
| GO:0019538       | protein metabolic process                   | 744       | 97          | 56.48    | 1.3e-09 | 2.8e-08 |
| GO:0044237       | cellular metabolic process                  | 1425      | 150         | 108.18   | 2.3e-08 | 4.5e-07 |
| GO:0044260       | cellular macromolecule metabolic process    | 1029      | 115         | 78.12    | 2.5e-07 | 4.5e-06 |
| GO:0006807       | nitrogen compound metabolic process         | 1494      | 148         | 113.42   | 3.3e-06 | 5.5e-05 |
| GO:0071704       | organic substance metabolic process         | 1665      | 160         | 126.4    | 5.6e-06 | 8.7e-05 |
| GO:1902600       | proton transmembrane transport              | 25        | 10          | 1.9      | 6.3e-06 | 9.2e-05 |
| GO:0044238       | primary metabolic process                   | 1584      | 153         | 120.25   | 1.0e-05 | 1.4e-4  |
| GO:0009987       | cellular process                            | 1960      | 179         | 148.79   | 2.3e-05 | 3.0e-4  |
| GO:0009141       | nucleoside triphosphate metabolic proces... | 27        | 9           | 2.05     | 1.0e-4  | 0.001   |
| GO:0006575       | cellular modified amino acid metabolic p... | 8         | 5           | 0.61     | 1.1e-4  | 0.001   |
| GO:0008152       | metabolic process                           | 2076      | 184         | 157.6    | 1.5e-4  | 0.002   |
| GO:0042398       | cellular modified amino acid biosyntheti... | 5         | 4           | 0.38     | 1.5e-4  | 0.002   |
| GO:0098655       | cation transmembrane transport              | 36        | 10          | 2.73     | 2.3e-4  | 0.002   |
| GO:0098660       | inorganic ion transmembrane transport       | 36        | 10          | 2.73     | 2.3e-4  | 0.002   |
| GO:0098662       | inorganic cation transmembrane transport    | 36        | 10          | 2.73     | 2.3e-4  | 0.002   |
| GO:0046034       | ATP metabolic process                       | 25        | 8           | 1.9      | 3.4e-4  | 0.003   |
| GO:0043170       | macromolecule metabolic process             | 1370      | 130         | 104      | 3.5e-4  | 0.003   |
| GO:0009144       | purine nucleoside triphosphate metabolic... | 26        | 8           | 1.97     | 4.6e-4  | 0.004   |
| GO:0009199       | ribonucleoside triphosphate metabolic pr... | 26        | 8           | 1.97     | 4.6e-4  | 0.004   |
| GO:0009205       | purine ribonucleoside triphosphate metab... | 26        | 8           | 1.97     | 4.6e-4  | 0.004   |
| GO:0009123       | nucleoside monophosphate metabolic proce... | 27        | 8           | 2.05     | 6.1e-4  | 0.004   |
| GO:0009126       | purine nucleoside monophosphate metaboli... | 27        | 8           | 2.05     | 6.1e-4  | 0.004   |
| GO:0009161       | ribonucleoside monophosphate metabolic p... | 27        | 8           | 2.05     | 6.1e-4  | 0.004   |
| GO:0009167       | purine ribonucleoside monophosphate meta... | 27        | 8           | 2.05     | 6.1e-4  | 0.004   |
| GO:0034220       | ion transmembrane transport                 | 41        | 10          | 3.11     | 7.2e-4  | 0.005   |
| GO:0015985       | energy coupled proton transport, down el... | 11        | 5           | 0.84     | 7.7e-4  | 0.005   |
| GO:0015986       | ATP synthesis coupled proton transport      | 11        | 5           | 0.84     | 7.7e-4  | 0.005   |
| GO:1901137       | carbohydrate derivative biosynthetic pro... | 76        | 14          | 5.77     | 0.001   | 0.009   |
| GO:0045333       | cellular respiration                        | 8         | 4           | 0.61     | 0.002   | 0.011   |
| GO:0006754       | ATP biosynthetic process                    | 19        | 6           | 1.44     | 0.002   | 0.011   |
| GO:0009142       | nucleoside triphosphate biosynthetic pro... | 19        | 6           | 1.44     | 0.002   | 0.011   |
| GO:0009145       | purine nucleoside triphosphate biosynthe... | 19        | 6           | 1.44     | 0.002   | 0.011   |
| GO:0009201       | ribonucleoside triphosphate biosynthetic... | 19        | 6           | 1.44     | 0.002   | 0.011   |
| GO:0009206       | purine ribonucleoside triphosphate biosy... | 19        | 6           | 1.44     | 0.002   | 0.011   |
| GO:0015672       | monovalent inorganic cation transport       | 47        | 10          | 3.57     | 0.002   | 0.011   |
| GO:0006790       | sulfur compound metabolic process           | 14        | 5           | 1.06     | 0.003   | 0.014   |
| GO:0006091       | generation of precursor metabolites and ... | 20        | 6           | 1.52     | 0.003   | 0.014   |
| GO:0015980       | energy derivation by oxidation of organi... | 9         | 4           | 0.68     | 0.003   | 0.014   |
| GO:0061024       | membrane organization                       | 9         | 4           | 0.68     | 0.003   | 0.014   |
| GO:0009150       | purine ribonucleotide metabolic process     | 42        | 9           | 3.19     | 0.004   | 0.016   |
| GO:0009259       | ribonucleotide metabolic process            | 42        | 9           | 3.19     | 0.004   | 0.016   |
| GO:0009124       | nucleoside monophosphate biosynthetic pr... | 21        | 6           | 1.59     | 0.004   | 0.016   |

Continued on next page



Table S4 – Continued from previous page

| GO.ID      | Term                                        | Annotated | Significant | Expected | pvalue | FDR   |
|------------|---------------------------------------------|-----------|-------------|----------|--------|-------|
| GO:0009127 | purine nucleoside monophosphate biosynth... | 21        | 6           | 1.59     | 0.004  | 0.016 |
| GO:0009156 | ribonucleoside monophosphate biosyntheti... | 21        | 6           | 1.59     | 0.004  | 0.016 |
| GO:0009168 | purine ribonucleoside monophosphate bios... | 21        | 6           | 1.59     | 0.004  | 0.016 |
| GO:0007005 | mitochondrion organization                  | 10        | 4           | 0.76     | 0.005  | 0.018 |
| GO:0015988 | energy coupled proton transmembrane tran... | 10        | 4           | 0.76     | 0.005  | 0.018 |
| GO:0015991 | ATP hydrolysis coupled proton transport     | 10        | 4           | 0.76     | 0.005  | 0.018 |
| GO:0090662 | ATP hydrolysis coupled transmembrane tra... | 10        | 4           | 0.76     | 0.005  | 0.018 |
| GO:0099131 | ATP hydrolysis coupled ion transmembrane... | 10        | 4           | 0.76     | 0.005  | 0.018 |
| GO:0099132 | ATP hydrolysis coupled cation transmembr... | 10        | 4           | 0.76     | 0.005  | 0.018 |
| GO:0019693 | ribose phosphate metabolic process          | 44        | 9           | 3.34     | 0.005  | 0.018 |
| GO:0009100 | glycoprotein metabolic process              | 29        | 7           | 2.2      | 0.005  | 0.018 |
| GO:0006163 | purine nucleotide metabolic process         | 46        | 9           | 3.49     | 0.007  | 0.024 |
| GO:0072521 | purine-containing compound metabolic pro... | 47        | 9           | 3.57     | 0.008  | 0.028 |
| GO:0009056 | catabolic process                           | 82        | 13          | 6.22     | 0.008  | 0.028 |
| GO:1901565 | organonitrogen compound catabolic proces... | 49        | 9           | 3.72     | 0.010  | 0.034 |
| GO:0009152 | purine ribonucleotide biosynthetic proce... | 33        | 7           | 2.51     | 0.010  | 0.034 |
| GO:0009260 | ribonucleotide biosynthetic process         | 33        | 7           | 2.51     | 0.010  | 0.034 |
| GO:0046390 | ribose phosphate biosynthetic process       | 33        | 7           | 2.51     | 0.010  | 0.034 |
| GO:1901575 | organic substance catabolic process         | 76        | 12          | 5.77     | 0.011  | 0.036 |
| GO:1901135 | carbohydrate derivative metabolic proces... | 144       | 19          | 10.93    | 0.011  | 0.037 |
| GO:0022900 | electron transport chain                    | 7         | 3           | 0.53     | 0.012  | 0.039 |
| GO:0006486 | protein glycosylation                       | 28        | 6           | 2.13     | 0.016  | 0.050 |
| GO:0009101 | glycoprotein biosynthetic process           | 28        | 6           | 2.13     | 0.016  | 0.050 |
| GO:0043413 | macromolecule glycosylation                 | 28        | 6           | 2.13     | 0.016  | 0.050 |
| GO:0070085 | glycosylation                               | 28        | 6           | 2.13     | 0.016  | 0.050 |
| GO:0006352 | DNA-templated transcription, initiation     | 21        | 5           | 1.59     | 0.018  | 0.053 |
| GO:0007015 | actin filament organization                 | 8         | 3           | 0.61     | 0.018  | 0.053 |
| GO:0031503 | protein-containing complex localization     | 8         | 3           | 0.61     | 0.018  | 0.053 |
| GO:0044248 | cellular catabolic process                  | 72        | 11          | 5.47     | 0.018  | 0.053 |
| GO:0006164 | purine nucleotide biosynthetic process      | 37        | 7           | 2.81     | 0.019  | 0.055 |
| GO:0030163 | protein catabolic process                   | 38        | 7           | 2.88     | 0.022  | 0.061 |
| GO:0072522 | purine-containing compound biosynthetic ... | 38        | 7           | 2.88     | 0.022  | 0.061 |
| GO:0051188 | cofactor biosynthetic process               | 30        | 6           | 2.28     | 0.023  | 0.063 |
| GO:0009057 | macromolecule catabolic process             | 50        | 8           | 3.8      | 0.033  | 0.088 |
| GO:0055085 | transmembrane transport                     | 283       | 30          | 21.48    | 0.034  | 0.092 |
| GO:0048518 | positive regulation of biological proces... | 17        | 4           | 1.29     | 0.035  | 0.093 |
| GO:0016043 | cellular component organization             | 162       | 19          | 12.3     | 0.035  | 0.093 |
| GO:0051186 | cofactor metabolic process                  | 42        | 7           | 3.19     | 0.036  | 0.094 |
| GO:0006753 | nucleoside phosphate metabolic process      | 72        | 10          | 5.47     | 0.043  | 0.109 |
| GO:0006812 | cation transport                            | 92        | 12          | 6.98     | 0.043  | 0.109 |
| GO:0030029 | actin filament-based process                | 11        | 3           | 0.84     | 0.045  | 0.109 |
| GO:0030036 | actin cytoskeleton organization             | 11        | 3           | 0.84     | 0.045  | 0.109 |
| GO:0019725 | cellular homeostasis                        | 35        | 6           | 2.66     | 0.045  | 0.109 |
| GO:0044257 | cellular protein catabolic process          | 35        | 6           | 2.66     | 0.045  | 0.109 |
| GO:0051603 | proteolysis involved in cellular protein... | 35        | 6           | 2.66     | 0.045  | 0.109 |
| GO:0071840 | cellular component organization or bioge... | 190       | 21          | 14.42    | 0.049  | 0.116 |

**Table S5:** Genes with strongest increase in connectivity in module 27.

|    | <i>C. obscurior</i><br>gene | <i>D. melanogaster</i><br>ortholog                                              | pfam domains                                                                 | putative function                                                              |
|----|-----------------------------|---------------------------------------------------------------------------------|------------------------------------------------------------------------------|--------------------------------------------------------------------------------|
| 1  | Cobs_15828                  | Protein lifeguard 4<br>(Q9DA39)                                                 | Bax1-I                                                                       | Anti-apoptotic protein<br>aka Golgi anti-apoptotic<br>protein (GAAP)           |
| 2  | Cobs_06161                  | FBgn0011284                                                                     | RS4NT, S4,<br>Ribosomal_S4e,<br>KOW, 40S_S4_C                                | Ribosomal protein S4                                                           |
| 3  | Cobs_09326                  | FBgn0015756                                                                     | Ribosomal_L6                                                                 | Ribosomal protein L9                                                           |
| 4  | Cobs_18136                  | FBgn0014391                                                                     | ATP-synt_Eps                                                                 | ATP synthase epsilon chain                                                     |
| 5  | Cobs_12509                  | FBgn0261596                                                                     | Ribosomal_S24e                                                               | Ribosomal protein S24                                                          |
| 6  | Cobs_17251                  | Short/branched chain specific acyl-CoA<br>dehydrogenase, mitochondrial (P45954) | Acyl-CoA_dh_N, Acyl-CoA_dh_M,<br>Acyl-CoA_dh_1, Linker_histone,<br>adh_short | short/branched chain specific<br>acyl-CoA dehydrogenase,<br>mitochondrial-like |
| 7  | Cobs_17813                  | FBgn0015031                                                                     | COX6C                                                                        | cytochrome c oxidase subunit VIc                                               |
| 8  | Cobs_07556                  | FBgn0031059                                                                     | NA                                                                           | uncharacterised                                                                |
| 9  | Cobs_07129                  | 60S ribosomal protein L35<br>(Q3MHM7)                                           | Ribosomal_L29                                                                | 60S ribosomal protein L35                                                      |
| 10 | Cobs_00057                  | 26S proteasome complex subunit<br>SEM1 (P60897)                                 | DSS1_SEM1                                                                    | 26S proteasome complex<br>subunit DSS1                                         |
